# Supplementary material for: Rational ensemble design of alloy catalysts for selective ammonia oxidation based on machine learning
Source: Royal Society of Chemistry journal article supplement (doi:10.1039/d2ta07216e), 2022-01-01
Supplement: d2ta07216e1.pdf [file d2ta07216e1.pdf]

## Supplementary information

### **Rational ensemble design of alloy catalysts for selective ammonia oxidation based on machine learning**

Jiaqiang Yang,<sup>a</sup> Zhaojie Wang,<sup>a</sup> Zhang Liu,<sup>a</sup> Qingbo Wang,<sup>b</sup> Yanwei Wen,<sup>a</sup> Aimin  
Zhang,<sup>c</sup> Rong Chen,<sup>\*,d</sup> and Bin Shan<sup>\*,a</sup>

<sup>a</sup> *State Key Laboratory of Material Processing and Die and Mould Technology and School of Materials Science and Engineering, Huazhong University of Science and Technology, Wuhan 430074, Hubei, China*

<sup>b</sup> *School of Mathematics and Physics, China University of Geosciences (Wuhan), Wuhan 430074, PR China*

<sup>c</sup> *State Key Laboratory of Advanced Technologies for Comprehensive Utilization of Platinum Metals, Kunming Institute of Precious Metals, Kunming 650106, China*

<sup>d</sup> *State Key Laboratory of Digital Manufacturing Equipment and Technology and School of Mechanical Science and Engineering, Huazhong University of Science and Technology, Wuhan 430074, Hubei, China*

## 1. Computational sets

High-throughput density functional theory (DFT) calculation is performed via VASP code. The exchange and correlation energy are in the form of generalized gradient approximation (GGA) with Perdew–Burke–Ernzerhof (PBE). Projector augmented wave (PAW) method is adopted to describe the electron-ion interactions. The Gaussian broadening with a width of 0.05 eV is used for the integration of the first Brillouin zone. The cutoff energy of 400 eV and Monkhorst–Pack k-meshes of  $3 \times 3 \times 1$  are needed for the calculation of binding energy at low-index faces of metallic catalysts. The bottom two layers of surface models are frozen and the top two layers and adsorption species are relaxed until the Hellmann–Feynman force is smaller than 0.05 eV/Å. The climbing-image nudged elastic band (CI-NEB) method is performed to locate the reaction barriers of elementary steps via inserting six intermediate images between initial and final configurations.

Benchmark calculation is also performed on the ensembles with relatively weak binding ability to check the effect of weak interaction. Ag\_Au\_111\_1 is selected as the representative with weak binding ability of intermediates to perform Van der Waals corrected calculation of binding energy and the comparison of binding energy with and without Van der Waals (VDW) correction ( $E_{b(vdw)}$  and  $E_b$ ) are shown in Table S1. It is found that the difference of binding energy with and without VDW correction are below 0.25 eV for the ensembles with weak binding ability, which the weak influence of Van der Waals interaction on the binding energies of intermediates in NH<sub>3</sub>-SCO process. Similarly, the VDW interaction is also not considered in previous study about NH<sub>3</sub>-SCO on metal catalysts.<sup>1-4</sup> Based that, weak interaction for adsorption behavior is ignored for accelerating calculation of binding energy in the study.

Table S1. The binding energies of intermediates with and without Van der Waals correction ( $E_{b(vdw)}$  and  $E_b$ ) on the ensembles Ag\_Au\_111\_1 as the representative with weak binding ability of intermediates.

| <i>Species</i>    | <i>NH<sub>3</sub></i> | <i>NH<sub>2</sub></i> | <i>NH</i> | <i>N</i> | <i>O</i> | <i>OH</i> | <i>H</i> |
|-------------------|-----------------------|-----------------------|-----------|----------|----------|-----------|----------|
| $E_{b(vdw)}$ (eV) | -0.56                 | -1.80                 | -2.47     | -2.32    | -0.29    | -2.55     | -2.16    |
| $E_b$ (eV)        | -0.319                | -1.546                | -2.259    | -2.161   | -0.165   | -2.36     | -2.086   |
| $E_{b(vdw)}-E_b$  | -0.25                 | -0.25                 | -0.21     | -0.16    | -0.12    | -0.19     | -0.07    |

## 2. The stability of ensembles

The stability of ensemble configurations is evaluated via the formation energy of ensembles ( $E_f$ ),<sup>5</sup> as followed:

$$E_f = - [E_{AB} - E_A - n_B(E_{B-atom} - E_{A-bulk})] / n_B$$

Where,  $E_{AB}$ ,  $E_A$ ,  $E_{A-bulk}$ , and  $E_{B-atom}$  are the total energies of the AB slab, clean A slab, bulk A atom (per atom) and isolated B atom, respectively and  $n_B$  is the number of B atoms. Note that A and B are for the host and doped elements. Taking an example, as for Pd\_Cu\_111\_1 ensemble, A and B represent Pd and Cu atoms and  $E_{AB}$ ,  $E_A$ ,  $E_{A-bulk}$ , and  $E_{B-atom}$  are for the energies of Pd\_Cu\_111\_1 ensemble, Pd(111), per Pd atom in bulk and isolated Cu atom, respectively and  $n_B$  is the number of doped Cu atoms in

Pd\_Cu\_111\_1 ensemble. The related calculated  $E_f$  for all ensembles are shown in Table S2.

The surface energy ( $E_{surf}$ ) of surface ensemble models are calculated to evaluate the stability.<sup>6,7</sup> The formula is followed:

$$E_{surf} = \frac{E_{AB} - n_A E_{A-bulk} - n_B E_{B-bulk}}{2S}$$

Where,  $E_{AB}$ , is the total energy of surface ensemble models (AB) and  $E_{A-bulk}$ , and  $E_{B-bulk}$  are the energy of per A and B atoms in bulk.  $n_A$  and  $n_B$  are the numbers of A and B atoms in the surface ensemble models.  $S$  is the area of the surface ensemble model.

Calculated formation energies and surface energies of different ensemble models are shown in Table S2. It is found that the ensemble configurations all exhibit the positive  $E_f$ , which demonstrates the formation of these ensembles should be an exothermic process. On the other hand, Ag-, Au-, Cu-, Pd- and Pt-based ensemble models possess a surface energy of below 2.00 J/m<sup>2</sup> and surface energy of Ir- and Rh-based surface models are larger than other systems. Overall, surface energies of all systems are smaller than 3.00 J/m<sup>2</sup> and the surface energies of surface-doped systems are generally near to the that of corresponding pristine systems.<sup>7</sup> Based on the theoretical calculation on surface energy and formation energy of ensembles, we believe that the ensembles should be stable. Note that two kinds of trimer configurations are calculated and the two show the similar formation energy and surface energy and thus the two kinds of trimers are viewed as the same configuration for the simplification in our study.

Table S2. The formation energy of ensembles ( $E_f$ ) (eV) of ensembles and surface energy ( $E_{surf}$ ) (J/m<sup>2</sup>) for alloy systems.

| <i>Ensembles</i> | $E_f$ (eV) | $E_{surf}$ (J/m <sup>2</sup> ) | <i>Ensembles</i> | $E_f$ (eV) | $E_{surf}$ (J/m <sup>2</sup> ) |
|------------------|------------|--------------------------------|------------------|------------|--------------------------------|
| Ag_Au_100_1      | 3.229      | 0.787                          | Ag_Au_111_1      | 3.247      | 0.729                          |
| Ag_Au_100_1L     | 3.131      | 0.712                          | Ag_Au_111_1L     | 3.154      | 0.605                          |
| Ag_Au_100_2      | 3.213      | 0.770                          | Ag_Au_111_2      | 3.244      | 0.700                          |
| Ag_Au_100_4      | 3.190      | 0.741                          | Ag_Au_111_3_0    | 3.229      | 0.677                          |
| Ag_Cu_100_1      | 3.006      | 0.858                          | Ag_Au_111_3_1    | 3.230      | 0.676                          |
| Ag_Cu_100_1L     | 2.978      | 1.283                          | Ag_Cu_111_1      | 3.007      | 0.826                          |
| Ag_Cu_100_2      | 2.994      | 0.910                          | Ag_Cu_111_1L     | 2.945      | 1.434                          |
| Ag_Cu_100_4      | 2.984      | 1.017                          | Ag_Cu_111_2      | 3.009      | 0.892                          |
| Ag_Ir_100_1      | 5.103      | 1.039                          | Ag_Cu_111_3_0    | 3.007      | 0.959                          |
| Ag_Ir_100_1L     | 5.257      | 2.746                          | Ag_Cu_111_3_1    | 3.007      | 0.959                          |
| Ag_Ir_100_2      | 5.350      | 1.219                          | Ag_Ir_111_1      | 5.117      | 1.066                          |
| Ag_Ir_100_4      | 5.615      | 1.521                          | Ag_Ir_111_1L     | 5.823      | 2.643                          |
| Ag_Pd_100_1      | 3.669      | 0.814                          | Ag_Ir_111_2      | 5.468      | 1.276                          |
| Ag_Pd_100_1L     | 3.446      | 1.073                          | Ag_Ir_111_3_0    | 5.593      | 1.482                          |
| Ag_Pd_100_2      | 3.594      | 0.836                          | Ag_Ir_111_3_1    | 5.590      | 1.483                          |
| Ag_Pd_100_4      | 3.559      | 0.879                          | Ag_Pd_111_1      | 3.577      | 0.781                          |
| Ag_Pt_100_1      | 5.084      | 0.849                          | Ag_Pd_111_1L     | 3.494      | 1.053                          |
| Ag_Pt_100_1L     | 4.851      | 1.400                          | Ag_Pd_111_2      | 3.491      | 0.826                          |

|              |       |       |               |       |       |
|--------------|-------|-------|---------------|-------|-------|
| Ag_Pt_100_2  | 5.014 | 0.906 | Ag_Pd_111_3_0 | 3.480 | 0.863 |
| Ag_Pt_100_4  | 4.970 | 1.022 | Ag_Pd_111_3_1 | 3.483 | 0.862 |
| Ag_Rh_100_1  | 4.569 | 0.951 | Ag_Pt_111_1   | 5.070 | 0.817 |
| Ag_Rh_100_1L | 4.519 | 2.145 | Ag_Pt_111_1L  | 5.114 | 1.223 |
| Ag_Rh_100_2  | 4.628 | 1.082 | Ag_Pt_111_2   | 5.026 | 0.887 |
| Ag_Rh_100_4  | 4.699 | 1.328 | Ag_Pt_111_3_0 | 5.073 | 0.931 |
| Au_Ag_100_1  | 2.592 | 0.855 | Ag_Pt_111_3_1 | 5.080 | 0.928 |
| Au_Ag_100_1L | 2.575 | 0.811 | Ag_Rh_111_1   | 4.461 | 0.966 |
| Au_Ag_100_2  | 2.648 | 0.836 | Ag_Rh_111_1L  | 4.773 | 2.227 |
| Au_Ag_100_4  | 2.626 | 0.819 | Ag_Rh_111_2   | 4.612 | 1.130 |
| Au_Cu_100_1  | 3.243 | 0.887 | Ag_Rh_111_3_0 | 4.700 | 1.279 |
| Au_Cu_100_1L | 3.213 | 1.118 | Ag_Rh_111_3_1 | 4.695 | 1.281 |
| Au_Cu_100_2  | 3.239 | 0.913 | Au_Ag_111_1   | 2.591 | 0.692 |
| Au_Cu_100_4  | 3.236 | 0.966 | Au_Ag_111_1L  | 2.501 | 0.725 |
| Au_Ir_100_1  | 5.180 | 1.084 | Au_Ag_111_2   | 2.584 | 0.684 |
| Au_Ir_100_1L | 5.325 | 2.728 | Au_Ag_111_3_0 | 2.571 | 0.681 |
| Au_Ir_100_2  | 5.376 | 1.266 | Au_Ag_111_3_1 | 2.572 | 0.681 |
| Au_Ir_100_4  | 5.580 | 1.587 | Au_Cu_111_1   | 3.190 | 0.743 |
| Au_Pd_100_1  | 3.623 | 0.873 | Au_Cu_111_1L  | 3.021 | 1.280 |
| Au_Pd_100_1L | 3.492 | 1.083 | Au_Cu_111_2   | 3.172 | 0.789 |
| Au_Pd_100_2  | 3.592 | 0.891 | Au_Cu_111_3_0 | 3.138 | 0.846 |
| Au_Pd_100_4  | 3.588 | 0.921 | Au_Cu_111_3_1 | 3.153 | 0.840 |
| Au_Pt_100_1  | 4.855 | 0.927 | Au_Ir_111_1   | 5.159 | 1.001 |
| Au_Pt_100_1L | 4.791 | 1.507 | Au_Ir_111_1L  | 5.731 | 2.690 |
| Au_Pt_100_2  | 4.840 | 0.995 | Au_Ir_111_2   | 5.476 | 1.213 |
| Au_Pt_100_4  | 4.849 | 1.125 | Au_Ir_111_3_0 | 5.593 | 1.421 |
| Au_Rh_100_1  | 4.706 | 0.991 | Au_Ir_111_3_1 | 5.598 | 1.419 |
| Au_Rh_100_1L | 4.667 | 2.056 | Au_Pd_111_1   | 3.431 | 0.743 |
| Au_Rh_100_2  | 4.753 | 1.110 | Au_Pd_111_1L  | 3.423 | 1.081 |
| Au_Rh_100_4  | 4.773 | 1.349 | Au_Pd_111_2   | 3.423 | 0.786 |
| Cu_Ag_100_1  | 2.690 | 1.429 | Au_Pd_111_3_0 | 3.422 | 0.829 |
| Cu_Ag_100_1L | 2.446 | 1.541 | Au_Pd_111_3_1 | 3.426 | 0.827 |
| Cu_Ag_100_2  | 2.650 | 1.417 | Au_Pt_111_1   | 4.762 | 0.801 |
| Cu_Ag_100_4  | 2.611 | 1.403 | Au_Pt_111_1L  | 4.950 | 1.365 |
| Cu_Au_100_1  | 3.583 | 1.377 | Au_Pt_111_2   | 4.804 | 0.889 |
| Cu_Au_100_1L | 3.101 | 1.363 | Au_Pt_111_3_0 | 4.870 | 0.956 |
| Cu_Au_100_2  | 3.509 | 1.322 | Au_Pt_111_3_1 | 4.866 | 0.957 |
| Cu_Au_100_4  | 3.428 | 1.236 | Au_Rh_111_1   | 4.563 | 0.893 |
| Cu_Ir_100_1  | 6.340 | 1.587 | Au_Rh_111_1L  | 4.762 | 2.176 |
| Cu_Ir_100_1L | 6.534 | 2.435 | Au_Rh_111_2   | 4.716 | 1.042 |
| Cu_Ir_100_2  | 6.459 | 1.690 | Au_Rh_111_3_0 | 4.779 | 1.186 |
| Cu_Ir_100_4  | 6.518 | 1.897 | Au_Rh_111_3_1 | 4.771 | 1.190 |
| Cu_Pd_100_1  | 4.152 | 1.395 | Ir_Ag_111_1   | 2.243 | 2.591 |
| Cu_Pd_100_1L | 3.799 | 1.369 | Ir_Ag_111_1L  | 2.618 | 2.407 |

|              |       |       |               |       |       |
|--------------|-------|-------|---------------|-------|-------|
| Cu_Pd_100_2  | 4.058 | 1.363 | Ir_Ag_111_2   | 2.197 | 2.649 |
| Cu_Pd_100_4  | 3.999 | 1.307 | Ir_Ag_111_3_0 | 2.227 | 2.686 |
| Cu_Pt_100_1  | 5.857 | 1.402 | Ir_Ag_111_3_1 | 2.195 | 2.701 |
| Cu_Pt_100_1L | 5.487 | 1.452 | Ir_Au_111_1   | 3.050 | 2.544 |
| Cu_Pt_100_2  | 5.769 | 1.376 | Ir_Au_111_1L  | 3.210 | 2.288 |
| Cu_Pt_100_4  | 5.703 | 1.336 | Ir_Au_111_2   | 3.019 | 2.550 |
| Cu_Rh_100_1  | 5.471 | 1.517 | Ir_Au_111_3_0 | 3.015 | 2.553 |
| Cu_Rh_100_1L | 5.463 | 2.052 | Ir_Au_111_3_1 | 2.993 | 2.564 |
| Cu_Rh_100_2  | 5.477 | 1.581 | Ir_Cu_111_1   | 3.348 | 2.569 |
| Cu_Rh_100_4  | 5.436 | 1.733 | Ir_Cu_111_1L  | 3.609 | 2.376 |
| Ir_Ag_100_1  | 2.838 | 2.922 | Ir_Cu_111_2   | 3.294 | 2.609 |
| Ir_Ag_100_1L | 3.039 | 2.405 | Ir_Cu_111_3_0 | 3.327 | 2.624 |
| Ir_Ag_100_2  | 2.855 | 2.880 | Ir_Cu_111_3_1 | 3.295 | 2.640 |
| Ir_Ag_100_4  | 2.874 | 2.792 | Ir_Pd_111_1   | 3.836 | 2.530 |
| Ir_Au_100_1  | 3.503 | 2.903 | Ir_Pd_111_1L  | 4.012 | 2.147 |
| Ir_Au_100_1L | 3.584 | 2.366 | Ir_Pd_111_2   | 3.838 | 2.513 |
| Ir_Au_100_2  | 3.504 | 2.847 | Ir_Pd_111_3_0 | 3.853 | 2.489 |
| Ir_Au_100_4  | 3.479 | 2.746 | Ir_Pd_111_3_1 | 3.853 | 2.489 |
| Ir_Cu_100_1  | 3.807 | 2.922 | Ir_Pt_111_1   | 5.780 | 2.501 |
| Ir_Cu_100_1L | 4.063 | 2.347 | Ir_Pt_111_1L  | 5.842 | 2.043 |
| Ir_Cu_100_2  | 3.857 | 2.873 | Ir_Pt_111_2   | 5.786 | 2.453 |
| Ir_Cu_100_4  | 3.904 | 2.763 | Ir_Pt_111_3_0 | 5.793 | 2.402 |
| Ir_Pd_100_1  | 4.248 | 2.898 | Ir_Pt_111_3_1 | 5.794 | 2.402 |
| Ir_Pd_100_1L | 4.322 | 2.328 | Ir_Rh_111_1   | 6.027 | 2.536 |
| Ir_Pd_100_2  | 4.285 | 2.828 | Ir_Rh_111_1L  | 6.033 | 2.441 |
| Ir_Pd_100_4  | 4.291 | 2.694 | Ir_Rh_111_2   | 6.024 | 2.526 |
| Ir_Pt_100_1  | 5.982 | 2.901 | Ir_Rh_111_3_0 | 6.024 | 2.516 |
| Ir_Pt_100_1L | 6.029 | 2.381 | Ir_Rh_111_3_1 | 6.023 | 2.516 |
| Ir_Pt_100_2  | 5.998 | 2.839 | Cu_Ag_111_1   | 2.537 | 1.400 |
| Ir_Pt_100_4  | 6.007 | 2.713 | Cu_Ag_111_1L  | 2.178 | 1.956 |
| Ir_Rh_100_1  | 6.249 | 2.925 | Cu_Ag_111_2   | 2.501 | 1.410 |
| Ir_Rh_100_1L | 6.228 | 2.671 | Cu_Ag_111_3_0 | 2.470 | 1.430 |
| Ir_Rh_100_2  | 6.250 | 2.890 | Cu_Ag_111_3_1 | 2.470 | 1.430 |
| Ir_Rh_100_4  | 6.245 | 2.823 | Cu_Au_111_1   | 3.538 | 1.311 |
| Pd_Ag_100_1  | 2.894 | 1.439 | Cu_Au_111_1L  | 2.748 | 1.857 |
| Pd_Ag_100_1L | 2.912 | 1.078 | Cu_Au_111_2   | 3.456 | 1.249 |
| Pd_Ag_100_2  | 2.898 | 1.395 | Cu_Au_111_3_0 | 3.381 | 1.213 |
| Pd_Ag_100_4  | 2.898 | 1.308 | Cu_Au_111_3_1 | 3.381 | 1.213 |
| Pd_Au_100_1  | 3.504 | 1.427 | Cu_Ir_111_1   | 6.478 | 1.559 |
| Pd_Au_100_1L | 3.450 | 1.047 | Cu_Ir_111_1L  | 6.912 | 2.101 |
| Pd_Au_100_2  | 3.490 | 1.376 | Cu_Ir_111_2   | 6.665 | 1.647 |
| Pd_Au_100_4  | 3.472 | 1.279 | Cu_Ir_111_3_0 | 6.656 | 1.774 |
| Pd_Cu_100_1  | 3.639 | 1.464 | Cu_Ir_111_3_1 | 6.661 | 1.771 |
| Pd_Cu_100_1L | 3.641 | 1.326 | Cu_Pd_111_1   | 3.962 | 1.362 |

|              |       |       |               |        |       |
|--------------|-------|-------|---------------|--------|-------|
| Pd_Cu_100_2  | 3.637 | 1.448 | Cu_Pd_111_1L  | 3.737  | 1.393 |
| Pd_Cu_100_4  | 3.637 | 1.414 | Cu_Pd_111_2   | 3.926  | 1.333 |
| Pd_Ir_100_1  | 6.456 | 1.583 | Cu_Pd_111_3_0 | 3.922  | 1.300 |
| Pd_Ir_100_1L | 6.450 | 2.402 | Cu_Pd_111_3_1 | 3.921  | 1.300 |
| Pd_Ir_100_2  | 6.500 | 1.675 | Cu_Pt_111_1   | 5.852  | 1.337 |
| Pd_Ir_100_4  | 6.507 | 1.865 | Cu_Pt_111_1L  | 5.540  | 1.319 |
| Pd_Pt_100_1  | 5.414 | 1.490 | Cu_Pt_111_2   | 5.834  | 1.279 |
| Pd_Pt_100_1L | 5.378 | 1.595 | Cu_Pt_111_3_0 | 5.854  | 1.205 |
| Pd_Pt_100_2  | 5.415 | 1.498 | Cu_Pt_111_3_1 | 5.851  | 1.207 |
| Pd_Pt_100_4  | 5.406 | 1.519 | Cu_Rh_111_1   | 5.396  | 1.504 |
| Pd_Rh_100_1  | 5.338 | 1.553 | Cu_Rh_111_1L  | 5.595  | 1.990 |
| Pd_Rh_100_1L | 5.360 | 2.098 | Cu_Rh_111_2   | 5.504  | 1.566 |
| Pd_Rh_100_2  | 5.362 | 1.618 | Cu_Rh_111_3_0 | 5.500  | 1.650 |
| Pd_Rh_100_4  | 5.367 | 1.752 | Cu_Rh_111_3_1 | 5.510  | 1.645 |
| Pt_Ag_100_1  | 2.930 | 1.793 | Pt_Ag_111_1   | 2.627  | 1.646 |
| Pt_Ag_100_1L | 2.978 | 1.374 | Pt_Ag_111_1L  | 2.765  | 1.331 |
| Pt_Ag_100_2  | 2.949 | 1.742 | Pt_Ag_111_2   | 2.684  | 1.613 |
| Pt_Ag_100_4  | 2.956 | 1.642 | Pt_Ag_111_3_0 | 2.743  | 1.562 |
| Pt_Au_100_1  | 3.387 | 1.799 | Pt_Ag_111_3_1 | 2.720  | 1.572 |
| Pt_Au_100_1L | 3.435 | 1.427 | Pt_Au_111_1   | 3.186  | 1.639 |
| Pt_Au_100_2  | 3.391 | 1.757 | Pt_Au_111_1L  | 3.267  | 1.340 |
| Pt_Au_100_4  | 3.392 | 1.675 | Pt_Au_111_2   | 3.207  | 1.609 |
| Pt_Cu_100_1  | 3.686 | 1.817 | Pt_Au_111_3_0 | 3.224  | 1.574 |
| Pt_Cu_100_1L | 3.833 | 1.490 | Pt_Au_111_3_1 | 3.230  | 1.572 |
| Pt_Cu_100_2  | 3.741 | 1.782 | Pt_Cu_111_1   | 3.508  | 1.66  |
| Pt_Cu_100_4  | 3.782 | 1.707 | Pt_Cu_111_1L  | 3.553  | 1.576 |
| Pt_Ir_100_1  | 6.667 | 1.915 | Pt_Cu_111_2   | 3.545  | 1.646 |
| Pt_Ir_100_1L | 6.648 | 2.545 | Pt_Cu_111_3_0 | 3.571  | 1.626 |
| Pt_Ir_100_2  | 6.680 | 1.989 | Pt_Cu_111_3_1 | 3.592  | 1.616 |
| Pt_Ir_100_4  | 6.667 | 2.144 | Pt_Ir_111_1   | 6.666  | 1.764 |
| Pt_Pd_100_1  | 3.940 | 1.816 | Pt_Ir_111_1L  | 6.765  | 2.446 |
| Pt_Pd_100_1L | 3.932 | 1.635 | Pt_Ir_111_2   | 6.700  | 1.856 |
| Pt_Pd_100_2  | 3.941 | 1.792 | Pt_Ir_111_3_0 | 6.719  | 1.944 |
| Pt_Pd_100_4  | 3.940 | 1.745 | Pt_Ir_111_3_1 | 6.7300 | 1.939 |
| Pt_Rh_100_1  | 5.694 | 1.869 | Pt_Pd_111_1   | 3.791  | 1.654 |
| Pt_Rh_100_1L | 5.664 | 2.138 | Pt_Pd_111_1L  | 3.806  | 1.561 |
| Pt_Rh_100_2  | 5.693 | 1.899 | Pt_Pd_111_2   | 3.799  | 1.642 |
| Pt_Rh_100_4  | 5.686 | 1.962 | Pt_Pd_111_3_0 | 3.804  | 1.630 |
| Rh_Ag_100_1  | 2.878 | 2.468 | Pt_Pd_111_3_1 | 3.804  | 1.630 |
| Rh_Ag_100_1L | 3.020 | 1.966 | Pt_Rh_111_1   | 5.612  | 1.715 |
| Rh_Ag_100_2  | 2.878 | 2.425 | Pt_Rh_111_1L  | 5.579  | 2.176 |
| Rh_Ag_100_4  | 2.891 | 2.332 | Pt_Rh_111_2   | 5.611  | 1.767 |
| Rh_Au_100_1  | 3.643 | 2.437 | Pt_Rh_111_3_0 | 5.606  | 1.821 |
| Rh_Au_100_1L | 3.625 | 1.861 | Pt_Rh_111_3_1 | 5.605  | 1.822 |

|              |       |       |               |       |       |
|--------------|-------|-------|---------------|-------|-------|
| Rh_Au_100_2  | 3.625 | 2.367 | Pd_Ag_111_1   | 2.852 | 1.471 |
| Rh_Au_100_4  | 3.596 | 2.237 | Pd_Ag_111_1L  | 2.825 | 1.102 |
| Rh_Cu_100_1  | 3.798 | 2.474 | Pd_Ag_111_2   | 2.875 | 1.413 |
| Rh_Cu_100_1L | 3.934 | 2.027 | Pd_Ag_111_3_0 | 2.888 | 1.353 |
| Rh_Cu_100_2  | 3.808 | 2.435 | Pd_Ag_111_3_1 | 2.896 | 1.350 |
| Rh_Cu_100_4  | 3.840 | 2.342 | Pd_Au_111_1   | 3.588 | 1.436 |
| Rh_Ir_100_1  | 7.181 | 2.531 | Pd_Au_111_1L  | 3.403 | 1.007 |
| Rh_Ir_100_1L | 7.155 | 2.717 | Pd_Au_111_2   | 3.573 | 1.355 |
| Rh_Ir_100_2  | 7.177 | 2.552 | Pd_Au_111_3_0 | 3.556 | 1.280 |
| Rh_Ir_100_4  | 7.170 | 2.596 | Pd_Au_111_3_1 | 3.558 | 1.279 |
| Rh_Pd_100_1  | 4.115 | 2.465 | Pd_Cu_111_1   | 3.676 | 1.493 |
| Rh_Pd_100_1L | 4.157 | 2.047 | Pd_Cu_111_1L  | 3.566 | 1.416 |
| Rh_Pd_100_2  | 4.127 | 2.416 | Pd_Cu_111_2   | 3.675 | 1.465 |
| Rh_Pd_100_4  | 4.133 | 2.317 | Pd_Cu_111_3_0 | 3.665 | 1.441 |
| Rh_Pt_100_1  | 5.935 | 2.458 | Pd_Cu_111_3_1 | 3.673 | 1.438 |
| Rh_Pt_100_1L | 5.919 | 2.042 | Pd_Ir_111_1   | 6.588 | 1.637 |
| Rh_Pt_100_2  | 5.931 | 2.404 | Pd_Ir_111_1L  | 6.746 | 2.342 |
| Rh_Pt_100_4  | 5.928 | 2.299 | Pd_Ir_111_2   | 6.672 | 1.727 |
|              |       |       | Pd_Ir_111_3_0 | 6.689 | 1.822 |
|              |       |       | Pd_Ir_111_3_1 | 6.714 | 1.810 |
|              |       |       | Pd_Pt_111_1   | 5.534 | 1.515 |
|              |       |       | Pd_Pt_111_1L  | 5.538 | 1.453 |
|              |       |       | Pd_Pt_111_2   | 5.540 | 1.506 |
|              |       |       | Pd_Pt_111_3_0 | 5.543 | 1.497 |
|              |       |       | Pd_Pt_111_3_1 | 5.543 | 1.496 |
|              |       |       | Pd_Rh_111_1   | 5.357 | 1.613 |
|              |       |       | Pd_Rh_111_1L  | 5.451 | 2.219 |
|              |       |       | Pd_Rh_111_2   | 5.394 | 1.694 |
|              |       |       | Pd_Rh_111_3_0 | 5.414 | 1.771 |
|              |       |       | Pd_Rh_111_3_1 | 5.426 | 1.765 |
|              |       |       | Rh_Ag_111_1   | 2.526 | 2.389 |
|              |       |       | Rh_Ag_111_1L  | 2.707 | 2.119 |
|              |       |       | Rh_Ag_111_2   | 2.486 | 2.401 |
|              |       |       | Rh_Ag_111_3_0 | 2.477 | 2.411 |
|              |       |       | Rh_Ag_111_3_1 | 2.508 | 2.396 |
|              |       |       | Rh_Au_111_1   | 3.432 | 2.325 |
|              |       |       | Rh_Au_111_1L  | 3.340 | 1.938 |
|              |       |       | Rh_Au_111_2   | 3.381 | 2.276 |
|              |       |       | Rh_Au_111_3_0 | 3.339 | 2.240 |
|              |       |       | Rh_Au_111_3_1 | 3.360 | 2.230 |
|              |       |       | Rh_Cu_111_1   | 3.548 | 2.381 |
|              |       |       | Rh_Cu_111_1L  | 3.647 | 2.161 |
|              |       |       | Rh_Cu_111_2   | 3.511 | 2.383 |
|              |       |       | Rh_Cu_111_3_0 | 3.497 | 2.386 |

|  |               |       |       |
|--|---------------|-------|-------|
|  | Rh_Cu_111_3_1 | 3.522 | 2.375 |
|  | Rh_Ir_111_1   | 7.338 | 2.391 |
|  | Rh_Ir_111_1L  | 7.317 | 2.428 |
|  | Rh_Ir_111_2   | 7.328 | 2.395 |
|  | Rh_Ir_111_3_0 | 7.321 | 2.401 |
|  | Rh_Ir_111_3_1 | 7.321 | 2.401 |
|  | Rh_Pd_111_1   | 3.947 | 2.355 |
|  | Rh_Pd_111_1L  | 3.988 | 2.016 |
|  | Rh_Pd_111_2   | 3.935 | 2.324 |
|  | Rh_Pd_111_3_0 | 3.933 | 2.292 |
|  | Rh_Pd_111_3_1 | 3.935 | 2.291 |
|  | Rh_Pt_111_1   | 5.927 | 2.319 |
|  | Rh_Pt_111_1L  | 5.877 | 1.825 |
|  | Rh_Pt_111_2   | 5.910 | 2.254 |
|  | Rh_Pt_111_3_0 | 5.899 | 2.191 |
|  | Rh_Pt_111_3_1 | 5.899 | 2.191 |

### 3. Feature design for binding energy prediction

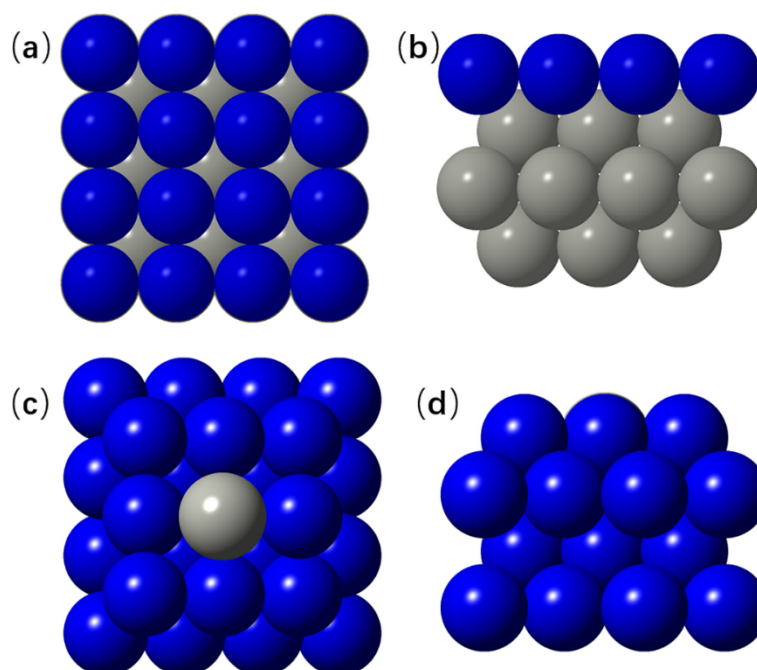

Fig. S1. The top and side views of Pd\_Cu\_100\_1L (a, b) and Cu\_Pd\_100\_1 (c, d).

Table S3. The values of surface and subsurface features for Pd\_Cu\_100\_1L and Cu\_Pd\_100\_1.

| Features      | Pd_Cu_100_1L | Cu_Pd_100_1 |
|---------------|--------------|-------------|
| ave_elec_surf | 11.0         | 10.89       |



|              |      |      |
|--------------|------|------|
| ave_rad_surf | 1.32 | 1.33 |
| ave_elec_sub | 10.0 | 11.0 |
| ave_rad_sub  | 1.39 | 1.32 |

#### 4. Ensemble machine learning on binding energy prediction

Table S4. The hyperparameter ranges and obtained hyperparameters of best models after hyperparameter optimization.

| Method | Hyperparameter range                                                                                             | Best Model                                                         |
|--------|------------------------------------------------------------------------------------------------------------------|--------------------------------------------------------------------|
| RFR    | {'n_estimators': [300,400,500,600,700,800],<br>'max_depth': [15,16,17,18,19,20,21,22]}                           | {'n_estimators':400,<br>max_depth':17}                             |
| ETR    | {'n_estimators': [300,400,500,600,700,800],<br>'max_depth': [15,16,17,18,19,20,21,22]}                           | {'n_estimators':400,<br>'max_depth':21}                            |
| GBR    | {'n_estimators': [900,1000,1100,1200,1300,1400,1500],<br>'max_depth': [2,3,4,5,6,7,8,9], 'learning_rate': [0.1]} | {'n_estimators':1100,<br>'max_depth':4,<br>'learning_rate': [0.1]} |

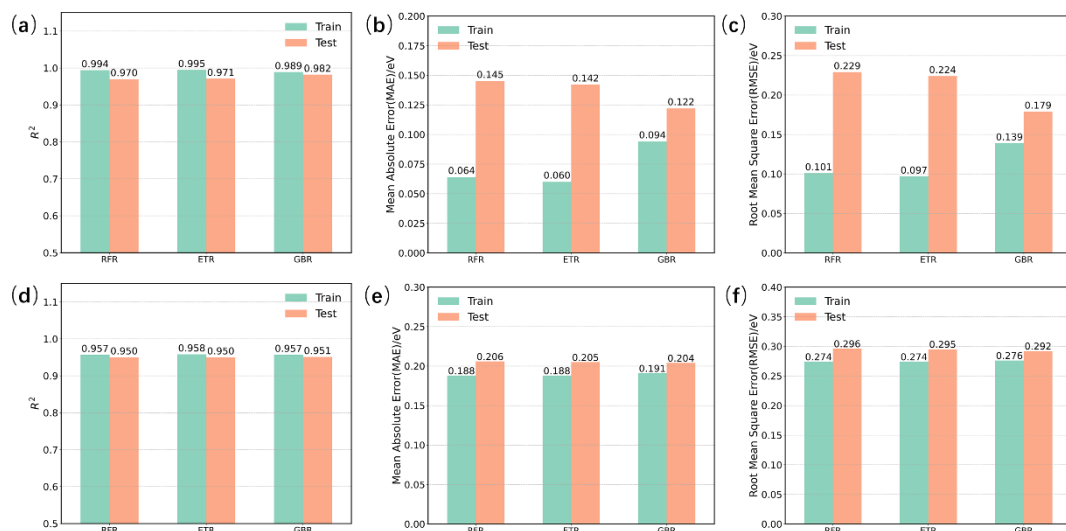

Fig. S2.  $R^2$ , MAE and RMSE of train and test sets for RFR, ETR, and GBR models with surface features ((a), (b), (c)) and without surface features ((d), (e), (f)).

#### 5. Clustering analysis

Table S5. The original data set for the clustering analysis on catalytic performance.

| E(NH <sub>3</sub> ) | E(NH <sub>2</sub> ) | E(NH)  | E(N)   | E(O)   | E(OH)  | E(H)   | Systems     |
|---------------------|---------------------|--------|--------|--------|--------|--------|-------------|
| -0.394              | -1.264              | -2.694 | -2.851 | -0.649 | -2.748 | -2.093 | Ag_Au_100_1 |
| -0.542              | -1.914              | -3.206 | -3.459 | -1.304 | -3.201 | -2.160 | Ag_Cu_100_1 |
| -0.458              | -1.590              | -3.012 | -3.271 | -0.920 | -2.848 | -2.383 | Ag_Pd_100_1 |
| -0.447              | -1.924              | -3.165 | -3.636 | -0.979 | -2.764 | -2.704 | Ag_Pt_100_1 |
| -1.025              | -2.833              | -3.944 | -5.065 | -1.951 | -3.418 | -3.182 | Ag_Ir_100_1 |
| -0.892              | -2.436              | -3.632 | -4.438 | -1.581 | -3.154 | -2.740 | Ag_Rh_100_1 |

---

|        |        |        |         |        |        |        |              |
|--------|--------|--------|---------|--------|--------|--------|--------------|
| -0.684 | -2.127 | -2.693 | -2.754  | -0.272 | -2.436 | -2.265 | Au_Ag_100_1  |
| -0.841 | -2.446 | -2.802 | -2.959  | -0.627 | -2.814 | -2.283 | Au_Cu_100_1  |
| -0.706 | -2.313 | -2.766 | -3.028  | -0.271 | -2.410 | -2.518 | Au_Pd_100_1  |
| -0.812 | -2.600 | -3.047 | -3.575  | -0.646 | -2.534 | -2.740 | Au_Pt_100_1  |
| -1.298 | -3.097 | -3.924 | -4.924  | -1.721 | -3.270 | -3.108 | Au_Ir_100_1  |
| -1.114 | -2.796 | -3.442 | -4.387  | -1.223 | -2.844 | -2.742 | Au_Rh_100_1  |
| -0.545 | -1.795 | -3.811 | -4.236  | -1.743 | -3.221 | -2.378 | Cu_Ag_100_1  |
| -0.565 | -1.749 | -3.596 | -4.037  | -1.478 | -3.067 | -2.317 | Cu_Au_100_1  |
| -0.592 | -1.782 | -3.973 | -4.517  | -1.798 | -3.229 | -2.556 | Cu_Pd_100_1  |
| -0.609 | -1.956 | -3.960 | -4.590  | -1.648 | -3.084 | -2.692 | Cu_Pt_100_1  |
| -1.062 | -2.702 | -4.510 | -5.435  | -2.163 | -3.221 | -3.037 | Cu_Ir_100_1  |
| -0.939 | -2.328 | -4.403 | -5.205  | -2.116 | -3.321 | -2.736 | Cu_Rh_100_1  |
| -0.741 | -1.675 | -3.815 | -4.712  | -1.147 | -2.761 | -2.718 | Pd_Ag_100_1  |
| -0.756 | -1.666 | -3.691 | -4.600  | -1.024 | -2.635 | -2.669 | Pd_Au_100_1  |
| -0.758 | -1.716 | -3.979 | -4.800  | -1.222 | -2.931 | -2.754 | Pd_Cu_100_1  |
| -0.806 | -2.090 | -4.108 | -4.920  | -1.259 | -2.742 | -2.887 | Pd_Pt_100_1  |
| -1.056 | -2.759 | -4.417 | -5.472  | -2.034 | -3.212 | -2.985 | Pd_Ir_100_1  |
| -1.035 | -2.428 | -4.388 | -5.382  | -1.779 | -3.037 | -2.834 | Pd_Rh_100_1  |
| -1.017 | -2.029 | -3.890 | -4.722  | -0.953 | -2.677 | -2.772 | Pt_Ag_100_1  |
| -1.055 | -2.047 | -3.798 | -4.621  | -0.853 | -2.519 | -2.746 | Pt_Au_100_1  |
| -1.090 | -2.115 | -4.015 | -4.836  | -1.138 | -2.983 | -2.812 | Pt_Cu_100_1  |
| -1.050 | -2.076 | -3.969 | -4.775  | -1.127 | -2.758 | -2.867 | Pt_Pd_100_1  |
| -1.281 | -2.663 | -4.336 | -5.274  | -1.855 | -3.058 | -2.942 | Pt_Ir_100_1  |
| -1.198 | -2.276 | -4.078 | -5.056  | -1.642 | -2.972 | -2.876 | Pt_Rh_100_1  |
| -1.169 | -2.914 | -4.626 | -5.619  | -1.854 | -3.006 | -2.895 | Ir_Ag_100_1  |
| -1.226 | -2.949 | -4.506 | -5.470  | -1.735 | -3.014 | -2.860 | Ir_Au_100_1  |
| -1.241 | -3.184 | -4.757 | -5.725  | -1.961 | -3.206 | -2.861 | Ir_Cu_100_1  |
| -1.233 | -3.246 | -4.748 | -5.677  | -1.923 | -3.081 | -2.894 | Ir_Pd_100_1  |
| -1.262 | -3.345 | -4.598 | -5.504  | -1.803 | -3.062 | -2.908 | Ir_Pt_100_1  |
| -1.242 | -3.453 | -4.793 | -5.632  | -2.068 | -3.244 | -2.928 | Ir_Rh_100_1  |
| -0.965 | -2.326 | -4.738 | -5.825  | -2.184 | -3.265 | -2.750 | Rh_Ag_100_1  |
| -0.997 | -2.341 | -4.610 | -5.679  | -2.041 | -3.149 | -2.707 | Rh_Au_100_1  |
| -0.708 | -2.388 | -4.882 | -5.944  | -2.290 | -3.358 | -2.787 | Rh_Cu_100_1  |
| -0.816 | -2.387 | -4.894 | -5.893  | -2.245 | -3.322 | -2.799 | Rh_Pd_100_1  |
| -0.807 | -2.103 | -4.794 | -5.591  | -2.093 | -3.194 | -2.859 | Rh_Pt_100_1  |
| -1.033 | -2.687 | -4.983 | -5.879  | -2.227 | -3.243 | -2.925 | Rh_Ir_100_1  |
| -0.399 | -1.893 | -2.325 | -2.520  | -0.025 | -2.072 | -2.254 | Ag_Au_100_1L |
| -0.708 | -2.993 | -4.260 | -4.743  | -2.193 | -3.613 | -2.424 | Ag_Cu_100_1L |
| -0.750 | -2.674 | -4.106 | -4.722  | -1.323 | -2.952 | -2.830 | Ag_Pd_100_1L |
| -0.997 | -3.424 | -4.420 | -5.066  | -1.688 | -3.196 | -3.098 | Ag_Pt_100_1L |
| -6.347 | -7.318 | -8.856 | -10.970 | -6.312 | -7.264 | -4.573 | Ag_Ir_100_1L |
| -2.820 | -4.623 | -5.923 | -7.349  | -3.510 | -4.877 | -4.807 | Ag_Rh_100_1L |
| -0.457 | -1.532 | -2.932 | -2.874  | -0.844 | -3.012 | -2.100 | Au_Ag_100_1L |
| -0.794 | -2.050 | -4.043 | -4.362  | -1.869 | -3.551 | -2.401 | Au_Cu_100_1L |

---

---

|        |        |        |         |        |        |        |              |
|--------|--------|--------|---------|--------|--------|--------|--------------|
| -0.818 | -1.844 | -4.009 | -4.613  | -1.185 | -2.964 | -2.811 | Au_Pd_100_1L |
| -1.616 | -2.301 | -4.377 | -5.073  | -1.684 | -3.201 | -3.159 | Au_Pt_100_1L |
| -6.375 | -7.577 | -9.374 | -10.029 | -6.038 | -7.083 | -4.302 | Au_Ir_100_1L |
| -2.890 | -3.590 | -5.322 | -6.558  | -2.951 | -4.072 | -4.608 | Au_Rh_100_1L |
| -1.284 | -1.855 | -2.961 | -2.798  | -0.563 | -2.619 | -2.512 | Cu_Ag_100_1L |
| -1.412 | -2.029 | -2.296 | -2.917  | -0.502 | -2.144 | -2.937 | Cu_Au_100_1L |
| -0.553 | -2.290 | -3.880 | -4.580  | -1.140 | -2.562 | -2.605 | Cu_Pd_100_1L |
| -2.190 | -2.591 | -3.871 | -4.011  | -1.008 | -2.206 | -2.663 | Cu_Pt_100_1L |
| -3.023 | -3.720 | -5.081 | -6.029  | -2.750 | -3.449 | -3.196 | Cu_Ir_100_1L |
| -0.941 | -3.259 | -4.974 | -6.019  | -2.176 | -3.171 | -2.748 | Cu_Rh_100_1L |
| -0.396 | -1.818 | -2.469 | -2.321  | -0.316 | -2.678 | -2.013 | Pd_Ag_100_1L |
| -0.428 | -1.788 | -2.190 | -2.388  | 0.301  | -1.863 | -2.222 | Pd_Au_100_1L |
| -0.731 | -2.733 | -3.765 | -4.509  | -1.506 | -3.229 | -2.396 | Pd_Cu_100_1L |
| -0.987 | -3.154 | -3.988 | -4.698  | -1.297 | -2.669 | -2.901 | Pd_Pt_100_1L |
| -0.700 | -3.864 | -5.075 | -6.002  | -2.527 | -3.635 | -3.008 | Pd_Ir_100_1L |
| -1.127 | -3.494 | -4.971 | -5.950  | -2.301 | -3.409 | -2.913 | Pd_Rh_100_1L |
| -0.456 | -1.892 | -2.462 | -2.268  | -0.268 | -2.692 | -2.048 | Pt_Ag_100_1L |
| -0.503 | -1.884 | -2.134 | -2.258  | 0.309  | -1.869 | -2.297 | Pt_Au_100_1L |
| -0.780 | -2.748 | -3.573 | -4.183  | -1.301 | -3.257 | -2.338 | Pt_Cu_100_1L |
| -0.810 | -2.664 | -3.853 | -4.584  | -1.056 | -2.867 | -2.675 | Pt_Pd_100_1L |
| -1.437 | -3.816 | -4.919 | -5.819  | -2.377 | -3.520 | -3.064 | Pt_Ir_100_1L |
| -1.101 | -3.361 | -4.748 | -5.630  | -2.120 | -3.326 | -2.877 | Pt_Rh_100_1L |
| -0.450 | -1.395 | -2.642 | -2.534  | -0.427 | -2.697 | -2.090 | Ir_Ag_100_1L |
| -0.487 | -1.198 | -2.319 | -2.483  | 0.227  | -1.893 | -2.315 | Ir_Au_100_1L |
| -0.711 | -1.833 | -3.633 | -4.615  | -1.444 | -3.182 | -2.347 | Ir_Cu_100_1L |
| -0.744 | -1.745 | -3.734 | -4.396  | -1.091 | -2.858 | -2.623 | Ir_Pd_100_1L |
| -0.922 | -1.957 | -3.703 | -4.327  | -0.986 | -2.470 | -2.824 | Ir_Pt_100_1L |
| -1.017 | -2.366 | -4.867 | -5.763  | -2.132 | -3.368 | -2.849 | Ir_Rh_100_1L |
| -0.381 | -1.763 | -2.503 | -2.474  | -0.368 | -2.600 | -2.041 | Rh_Ag_100_1L |
| -0.380 | -1.674 | -2.136 | -2.433  | 0.343  | -1.761 | -2.226 | Rh_Au_100_1L |
| -0.670 | -2.650 | -3.768 | -4.735  | -1.594 | -3.158 | -2.450 | Rh_Cu_100_1L |
| -0.728 | -2.517 | -3.940 | -4.682  | -1.243 | -2.809 | -2.687 | Rh_Pd_100_1L |
| -0.885 | -2.870 | -3.916 | -4.643  | -1.057 | -2.409 | -2.824 | Rh_Pt_100_1L |
| -1.203 | -3.546 | -4.781 | -5.620  | -2.193 | -3.228 | -2.937 | Rh_Ir_100_1L |
| -0.414 | -1.947 | -2.680 | -2.836  | -0.633 | -2.730 | -2.181 | Ag_Au_100_2  |
| -0.591 | -2.725 | -3.593 | -3.953  | -1.692 | -3.423 | -2.335 | Ag_Cu_100_2  |
| -0.524 | -2.418 | -3.337 | -3.797  | -1.091 | -2.909 | -2.693 | Ag_Pd_100_2  |
| -0.534 | -2.712 | -3.620 | -4.493  | -1.216 | -2.868 | -2.925 | Ag_Pt_100_2  |
| -0.949 | -3.329 | -4.831 | -6.182  | -2.358 | -3.666 | -3.169 | Ag_Ir_100_2  |
| -0.853 | -3.263 | -4.561 | -6.012  | -2.304 | -3.453 | -2.913 | Ag_Rh_100_2  |
| -0.594 | -2.072 | -2.723 | -2.771  | -0.377 | -2.561 | -2.354 | Au_Ag_100_2  |
| -0.866 | -2.647 | -3.740 | -4.611  | -1.236 | -3.039 | -2.993 | Au_Pt_100_2  |
| -0.746 | -2.358 | -3.166 | -3.682  | -0.633 | -2.857 | -2.683 | Au_Pd_100_2  |
| -0.866 | -2.647 | -3.740 | -4.611  | -1.236 | -3.039 | -2.993 | Au_Pt_100_2  |

---

---

|        |        |        |        |        |        |        |             |
|--------|--------|--------|--------|--------|--------|--------|-------------|
| -1.734 | -3.331 | -4.936 | -6.167 | -2.348 | -3.612 | -3.119 | Au_Ir_100_2 |
| -1.093 | -2.821 | -4.595 | -5.965 | -2.227 | -3.487 | -2.928 | Au_Rh_100_2 |
| -0.576 | -2.552 | -3.749 | -4.142 | -1.678 | -3.187 | -2.381 | Cu_Ag_100_2 |
| -0.645 | -2.551 | -3.492 | -3.902 | -1.399 | -3.088 | -2.326 | Cu_Au_100_2 |
| -0.629 | -2.626 | -3.971 | -4.504 | -1.726 | -3.203 | -2.592 | Cu_Pd_100_2 |
| -0.658 | -2.670 | -4.002 | -4.662 | -1.609 | -3.138 | -2.748 | Cu_Pt_100_2 |
| -0.919 | -3.215 | -4.610 | -5.617 | -2.126 | -3.478 | -3.026 | Cu_Ir_100_2 |
| -0.856 | -3.057 | -4.650 | -5.625 | -2.205 | -3.324 | -2.743 | Cu_Rh_100_2 |
| -0.754 | -2.643 | -3.848 | -4.775 | -1.198 | -2.903 | -2.777 | Pd_Ag_100_2 |
| -0.795 | -2.661 | -3.695 | -4.622 | -1.036 | -2.856 | -2.751 | Pd_Au_100_2 |
| -0.788 | -2.703 | -4.002 | -4.832 | -1.251 | -3.102 | -2.788 | Pd_Cu_100_2 |
| -0.835 | -2.966 | -4.102 | -4.913 | -1.394 | -2.990 | -2.920 | Pd_Pt_100_2 |
| -1.137 | -3.322 | -4.691 | -5.737 | -2.219 | -3.484 | -2.980 | Pd_Ir_100_2 |
| -1.077 | -3.306 | -4.596 | -5.694 | -2.220 | -3.409 | -2.887 | Pd_Rh_100_2 |
| -0.955 | -3.085 | -3.953 | -4.822 | -1.332 | -3.051 | -2.928 | Pt_Ag_100_2 |
| -1.024 | -3.125 | -3.831 | -4.682 | -1.250 | -3.026 | -2.918 | Pt_Au_100_2 |
| -1.079 | -3.157 | -4.047 | -4.890 | -1.405 | -3.222 | -2.943 | Pt_Cu_100_2 |
| -1.021 | -3.157 | -3.979 | -4.798 | -1.366 | -3.076 | -2.918 | Pt_Pd_100_2 |
| -1.320 | -3.531 | -4.640 | -5.618 | -2.139 | -3.440 | -3.007 | Pt_Ir_100_2 |
| -1.184 | -3.359 | -4.310 | -5.440 | -1.973 | -3.447 | -2.906 | Pt_Rh_100_2 |
| -1.100 | -2.875 | -4.675 | -5.701 | -2.198 | -3.472 | -2.990 | Ir_Ag_100_2 |
| -1.168 | -2.897 | -4.535 | -5.528 | -2.095 | -3.466 | -2.972 | Ir_Au_100_2 |
| -1.173 | -3.204 | -4.782 | -5.767 | -2.289 | -3.577 | -3.014 | Ir_Cu_100_2 |
| -1.185 | -3.187 | -4.738 | -5.688 | -2.244 | -3.524 | -2.994 | Ir_Pd_100_2 |
| -1.241 | -3.329 | -4.605 | -5.523 | -2.162 | -3.525 | -2.987 | Ir_Pt_100_2 |
| -1.214 | -3.434 | -4.849 | -5.697 | -2.238 | -3.550 | -2.984 | Ir_Rh_100_2 |
| -0.928 | -3.189 | -4.795 | -5.894 | -2.257 | -3.472 | -2.871 | Rh_Ag_100_2 |
| -0.984 | -3.227 | -4.968 | -5.791 | -2.130 | -3.434 | -2.849 | Rh_Au_100_2 |
| -0.979 | -3.296 | -4.910 | -5.976 | -2.328 | -3.554 | -2.887 | Rh_Cu_100_2 |
| -0.991 | -3.268 | -4.895 | -5.909 | -2.265 | -3.496 | -2.857 | Rh_Pd_100_2 |
| -1.042 | -3.296 | -4.798 | -5.599 | -2.094 | -3.482 | -2.877 | Rh_Pt_100_2 |
| -1.059 | -3.418 | -5.006 | -5.915 | -2.303 | -3.560 | -2.952 | Rh_Ir_100_2 |
| -0.443 | -1.870 | -2.622 | -2.767 | -0.539 | -2.696 | -2.174 | Ag_Au_100_4 |
| -0.649 | -2.841 | -4.123 | -4.684 | -2.074 | -3.532 | -2.366 | Ag_Cu_100_4 |
| -0.578 | -2.435 | -3.871 | -4.423 | -1.279 | -2.959 | -2.685 | Ag_Pd_100_4 |
| -0.633 | -2.798 | -3.935 | -4.698 | -1.386 | -2.935 | -2.850 | Ag_Pt_100_4 |
| -0.796 | -3.245 | -4.711 | -5.706 | -2.370 | -3.635 | -3.015 | Ag_Ir_100_4 |
| -0.848 | -3.200 | -4.585 | -5.947 | -2.295 | -3.442 | -2.819 | Ag_Rh_100_4 |
| -0.559 | -2.081 | -2.824 | -2.788 | -0.717 | -2.983 | -2.365 | Au_Ag_100_4 |
| -0.897 | -2.762 | -4.029 | -4.715 | -1.595 | -3.058 | -2.936 | Au_Pt_100_4 |
| -0.746 | -2.521 | -3.792 | -4.339 | -1.058 | -2.901 | -2.661 | Au_Pd_100_4 |
| -0.897 | -2.762 | -4.029 | -4.715 | -1.350 | -3.058 | -2.936 | Au_Pt_100_4 |
| -1.683 | -3.261 | -4.936 | -5.928 | -2.499 | -3.686 | -3.312 | Au_Ir_100_4 |
| -1.157 | -2.977 | -4.834 | -6.079 | -2.345 | -3.589 | -2.899 | Au_Rh_100_4 |

---

---

|        |        |        |        |        |        |        |             |
|--------|--------|--------|--------|--------|--------|--------|-------------|
| -0.425 | -2.167 | -3.705 | -4.064 | -1.633 | -3.138 | -2.409 | Cu_Ag_100_4 |
| -0.505 | -1.986 | -3.529 | -3.888 | -1.578 | -2.995 | -2.322 | Cu_Au_100_4 |
| -0.558 | -2.374 | -3.890 | -4.433 | -1.577 | -3.110 | -2.589 | Cu_Pd_100_4 |
| -0.626 | -2.587 | -4.027 | -4.752 | -1.644 | -2.878 | -2.837 | Cu_Pt_100_4 |
| -0.806 | -3.147 | -5.009 | -6.065 | -2.474 | -3.426 | -3.106 | Cu_Ir_100_4 |
| -0.864 | -3.026 | -4.900 | -5.901 | -2.428 | -3.511 | -2.987 | Cu_Rh_100_4 |
| -0.721 | -2.630 | -3.962 | -4.931 | -1.326 | -2.906 | -2.820 | Pd_Ag_100_4 |
| -0.816 | -2.634 | -3.765 | -4.755 | -1.104 | -2.814 | -2.735 | Pd_Au_100_4 |
| -0.791 | -2.719 | -4.092 | -4.940 | -1.341 | -3.195 | -2.814 | Pd_Cu_100_4 |
| -0.865 | -2.998 | -4.086 | -4.909 | -1.318 | -2.984 | -2.895 | Pd_Pt_100_4 |
| -1.284 | -3.451 | -4.721 | -5.701 | -2.291 | -3.576 | -3.024 | Pd_Ir_100_4 |
| -1.133 | -3.373 | -4.915 | -5.904 | -2.206 | -3.492 | -2.878 | Pd_Rh_100_4 |
| -0.843 | -2.557 | -4.039 | -4.946 | -1.407 | -2.955 | -2.977 | Pt_Ag_100_4 |
| -0.950 | -2.573 | -3.889 | -4.784 | -1.208 | -2.941 | -2.937 | Pt_Au_100_4 |
| -0.990 | -3.039 | -4.122 | -4.996 | -1.539 | -3.285 | -3.010 | Pt_Cu_100_4 |
| -0.969 | -2.948 | -3.986 | -4.813 | -1.415 | -3.019 | -2.925 | Pt_Pd_100_4 |
| -1.384 | -3.612 | -4.714 | -5.669 | -2.199 | -3.517 | -3.015 | Pt_Ir_100_4 |
| -1.163 | -3.354 | -4.766 | -5.698 | -2.045 | -3.490 | -2.892 | Pt_Rh_100_4 |
| -1.055 | -3.312 | -4.722 | -5.787 | -2.252 | -3.358 | -3.099 | Ir_Ag_100_4 |
| -1.192 | -3.403 | -4.567 | -5.596 | -2.122 | -3.431 | -3.059 | Ir_Au_100_4 |
| -1.087 | -3.442 | -4.809 | -5.844 | -2.414 | -3.559 | -3.116 | Ir_Cu_100_4 |
| -1.121 | -3.447 | -4.712 | -5.690 | -2.347 | -3.527 | -3.047 | Ir_Pd_100_4 |
| -1.219 | -3.501 | -4.587 | -5.526 | -2.182 | -3.534 | -2.897 | Ir_Pt_100_4 |
| -1.165 | -3.482 | -4.918 | -5.828 | -2.290 | -3.525 | -3.004 | Ir_Rh_100_4 |
| -0.808 | -3.143 | -4.821 | -5.951 | -2.322 | -3.370 | -2.934 | Rh_Ag_100_4 |
| -0.941 | -2.279 | -4.642 | -5.741 | -2.108 | -3.373 | -2.862 | Rh_Au_100_4 |
| -0.917 | -3.238 | -4.910 | -6.008 | -2.368 | -3.531 | -2.948 | Rh_Cu_100_4 |
| -0.974 | -3.268 | -4.865 | -5.902 | -2.267 | -3.502 | -2.871 | Rh_Pd_100_4 |
| -1.054 | -3.094 | -4.784 | -5.761 | -2.081 | -3.455 | -2.865 | Rh_Pt_100_4 |
| -1.104 | -3.437 | -5.046 | -5.962 | -2.291 | -3.572 | -2.945 | Rh_Ir_100_4 |
| -0.319 | -1.546 | -2.259 | -2.161 | -0.165 | -2.360 | -2.086 | Ag_Au_111_1 |
| -0.460 | -2.057 | -2.881 | -2.737 | -0.875 | -2.973 | -2.221 | Ag_Cu_111_1 |
| -0.517 | -1.890 | -2.649 | -2.885 | -0.520 | -2.582 | -2.487 | Ag_Pd_111_1 |
| -0.515 | -2.047 | -2.917 | -3.407 | -0.729 | -2.526 | -2.753 | Ag_Pt_111_1 |
| -1.095 | -2.759 | -3.922 | -5.042 | -1.813 | -3.198 | -3.075 | Ag_Ir_111_1 |
| -1.016 | -2.493 | -3.590 | -4.458 | -1.484 | -3.034 | -2.891 | Ag_Rh_111_1 |
| -0.462 | -1.515 | -2.248 | -2.212 | 0.098  | -2.106 | -2.205 | Au_Ag_111_1 |
| -0.656 | -1.919 | -2.784 | -2.761 | -0.384 | -2.512 | -2.263 | Au_Cu_111_1 |
| -0.715 | -1.829 | -2.748 | -3.147 | -0.233 | -2.150 | -2.587 | Au_Pd_111_1 |
| -0.822 | -2.047 | -3.027 | -3.565 | -0.456 | -2.405 | -2.752 | Au_Pt_111_1 |
| -1.320 | -2.693 | -3.791 | -4.814 | -1.355 | -3.041 | -3.045 | Au_Ir_111_1 |
| -1.187 | -2.375 | -3.507 | -4.368 | -1.030 | -2.795 | -2.717 | Au_Rh_111_1 |
| -0.431 | -2.069 | -3.404 | -3.540 | -1.350 | -2.967 | -2.348 | Cu_Ag_111_1 |
| -0.448 | -1.786 | -3.292 | -3.400 | -1.247 | -2.934 | -2.282 | Cu_Au_111_1 |

---

---

|        |        |        |        |        |        |        |              |
|--------|--------|--------|--------|--------|--------|--------|--------------|
| -0.538 | -2.177 | -3.393 | -3.733 | -1.231 | -2.840 | -2.634 | Cu_Pd_111_1  |
| -0.528 | -2.212 | -3.434 | -3.930 | -1.198 | -2.656 | -2.692 | Cu_Pt_111_1  |
| -0.930 | -2.659 | -4.100 | -5.012 | -1.859 | -3.012 | -2.913 | Cu_Ir_111_1  |
| -0.902 | -2.575 | -3.986 | -4.732 | -1.791 | -3.057 | -2.851 | Cu_Rh_111_1  |
| -0.794 | -2.489 | -3.532 | -5.083 | -1.072 | -2.707 | -2.846 | Pd_Ag_111_1  |
| -0.802 | -1.931 | -3.545 | -4.281 | -0.919 | -2.612 | -2.771 | Pd_Au_111_1  |
| -0.599 | -2.317 | -4.051 | -4.723 | -1.518 | -2.861 | -2.919 | Pd_Cu_111_1  |
| -0.925 | -2.659 | -4.333 | -5.167 | -1.570 | -2.705 | -2.969 | Pd_Pt_111_1  |
| -1.183 | -2.994 | -4.726 | -5.798 | -2.064 | -3.110 | -2.932 | Pd_Ir_111_1  |
| -1.166 | -2.949 | -4.699 | -5.727 | -2.038 | -3.040 | -2.978 | Pd_Rh_111_1  |
| -0.869 | -2.402 | -3.484 | -4.336 | -0.901 | -2.452 | -2.759 | Pt_Ag_111_1  |
| -0.876 | -1.926 | -3.503 | -4.280 | -0.734 | -2.320 | -2.683 | Pt_Au_111_1  |
| -0.933 | -2.624 | -4.181 | -4.993 | -1.281 | -2.585 | -2.801 | Pt_Cu_111_1  |
| -0.905 | -2.489 | -4.098 | -4.894 | -1.160 | -2.464 | -2.806 | Pt_Pd_111_1  |
| -1.261 | -2.785 | -4.417 | -5.286 | -1.572 | -2.896 | -2.859 | Pt_Ir_111_1  |
| -1.137 | -2.683 | -4.353 | -5.216 | -1.537 | -2.667 | -2.817 | Pt_Rh_111_1  |
| -0.924 | -2.651 | -3.829 | -4.781 | -1.428 | -2.771 | -2.746 | Ir_Ag_111_1  |
| -0.948 | -2.622 | -3.745 | -4.626 | -1.222 | -2.670 | -2.654 | Ir_Au_111_1  |
| -0.988 | -2.875 | -4.149 | -4.964 | -1.720 | -2.918 | -2.788 | Ir_Cu_111_1  |
| -0.978 | -2.786 | -4.263 | -5.067 | -1.668 | -2.852 | -2.811 | Ir_Pd_111_1  |
| -0.971 | -2.729 | -4.220 | -4.990 | -1.526 | -2.754 | -2.706 | Ir_Pt_111_1  |
| -0.962 | -2.792 | -4.514 | -5.359 | -1.873 | -2.863 | -2.816 | Ir_Rh_111_1  |
| -0.899 | -2.760 | -3.914 | -5.688 | -1.596 | -3.042 | -2.747 | Rh_Ag_111_1  |
| -0.931 | -2.120 | -3.833 | -4.785 | -2.069 | -2.979 | -2.842 | Rh_Au_111_1  |
| -0.941 | -2.926 | -4.245 | -5.183 | -1.903 | -3.154 | -2.793 | Rh_Cu_111_1  |
| -0.711 | -2.620 | -4.350 | -5.285 | -1.868 | -3.104 | -2.842 | Rh_Pd_111_1  |
| -0.955 | -2.823 | -4.347 | -5.262 | -1.764 | -3.025 | -2.767 | Rh_Pt_111_1  |
| -0.953 | -2.872 | -4.589 | -5.630 | -2.032 | -3.024 | -2.784 | Rh_Ir_111_1  |
| -0.293 | -1.385 | -2.123 | -2.291 | 0.241  | -1.882 | -2.145 | Ag_Au_111_1L |
| -0.811 | -3.041 | -4.139 | -4.370 | -2.234 | -3.899 | -2.661 | Ag_Cu_111_1L |
| -0.682 | -2.314 | -4.087 | -4.873 | -1.487 | -2.896 | -2.976 | Ag_Pd_111_1L |
| -0.834 | -2.667 | -4.667 | -5.545 | -1.731 | -2.928 | -3.150 | Ag_Pt_111_1L |
| -3.072 | -5.799 | -6.735 | -8.191 | -4.051 | -5.014 | -4.556 | Ag_Ir_111_1L |
| -1.270 | -4.079 | -6.237 | -7.496 | -3.516 | -4.367 | -3.572 | Ag_Rh_111_1L |
| -0.373 | -1.698 | -2.374 | -2.027 | -0.285 | -2.635 | -2.135 | Au_Ag_111_1L |
| -0.937 | -3.183 | -4.221 | -4.131 | -2.146 | -3.916 | -2.751 | Au_Cu_111_1L |
| -0.805 | -2.461 | -4.125 | -4.916 | -1.512 | -3.012 | -2.956 | Au_Pd_111_1L |
| -1.004 | -2.738 | -4.687 | -5.476 | -1.698 | -2.933 | -3.056 | Au_Pt_111_1L |
| -3.088 | -6.307 | -6.682 | -8.497 | -3.885 | -4.971 | -4.638 | Au_Ir_111_1L |
| -1.411 | -4.356 | -6.164 | -7.420 | -3.417 | -4.293 | -3.642 | Au_Rh_111_1L |
| -1.729 | -3.744 | -3.473 | -4.044 | -1.624 | -3.549 | -3.445 | Cu_Ag_111_1L |
| -2.214 | -3.316 | -3.815 | -5.345 | -2.062 | -3.730 | -4.542 | Cu_Au_111_1L |
| -0.406 | -1.783 | -2.876 | -3.581 | -0.570 | -2.080 | -2.582 | Cu_Pd_111_1L |
| -0.353 | -1.949 | -3.110 | -4.116 | -0.412 | -2.054 | -2.721 | Cu_Pt_111_1L |

---

---

|        |        |        |        |        |        |        |              |
|--------|--------|--------|--------|--------|--------|--------|--------------|
| -0.492 | -2.776 | -4.379 | -5.101 | -1.675 | -1.971 | -2.684 | Cu_Ir_111_1L |
| -0.624 | -2.736 | -4.532 | -5.373 | -1.955 | -2.619 | -2.722 | Cu_Rh_111_1L |
| -0.341 | -1.563 | -1.994 | -1.855 | -0.004 | -2.411 | -2.005 | Pd_Ag_111_1L |
| -0.294 | -1.211 | -1.657 | -2.021 | 0.569  | -1.770 | -1.944 | Pd_Au_111_1L |
| -0.688 | -2.522 | -3.771 | -4.112 | -1.711 | -3.463 | -2.498 | Pd_Cu_111_1L |
| -0.938 | -2.500 | -4.199 | -4.978 | -1.251 | -2.363 | -2.850 | Pd_Pt_111_1L |
| -1.227 | -3.344 | -5.256 | -6.266 | -2.388 | -3.172 | -3.081 | Pd_Ir_111_1L |
| -1.157 | -3.426 | -5.352 | -6.472 | -2.682 | -3.603 | -3.144 | Pd_Rh_111_1L |
| -0.375 | -1.640 | -2.276 | -2.025 | -0.184 | -2.460 | -2.075 | Pt_Ag_111_1L |
| -0.354 | -1.322 | -1.978 | -2.258 | 0.353  | -1.791 | -2.056 | Pt_Au_111_1L |
| -0.792 | -2.748 | -4.044 | -4.066 | -1.901 | -3.686 | -2.640 | Pt_Cu_111_1L |
| -0.754 | -2.359 | -3.896 | -4.806 | -1.329 | -2.675 | -2.839 | Pt_Pd_111_1L |
| -1.231 | -3.290 | -5.177 | -6.118 | -2.354 | -3.205 | -3.071 | Pt_Ir_111_1L |
| -1.105 | -3.193 | -5.114 | -6.148 | -2.525 | -3.511 | -2.983 | Pt_Rh_111_1L |
| -0.368 | -1.735 | -2.417 | -2.243 | -0.395 | -2.531 | -2.173 | Ir_Ag_111_1L |
| -0.312 | -1.368 | -1.951 | -2.208 | 0.239  | -1.899 | -2.021 | Ir_Au_111_1L |
| -0.713 | -2.644 | -4.062 | -4.115 | -1.960 | -3.619 | -2.586 | Ir_Cu_111_1L |
| -0.696 | -2.209 | -3.456 | -4.195 | -1.002 | -2.588 | -2.703 | Ir_Pd_111_1L |
| -0.707 | -1.969 | -3.103 | -3.866 | -0.495 | -2.124 | -2.534 | Ir_Pt_111_1L |
| -0.948 | -2.879 | -4.634 | -5.561 | -2.148 | -3.214 | -2.894 | Ir_Rh_111_1L |
| -0.301 | -1.566 | -2.171 | -1.991 | -0.175 | -2.364 | -2.061 | Rh_Ag_111_1L |
| -0.223 | -1.465 | -1.897 | -2.013 | 0.409  | -1.746 | -1.917 | Rh_Au_111_1L |
| -0.648 | -2.585 | -4.009 | -4.184 | -1.914 | -3.546 | -2.633 | Rh_Cu_111_1L |
| -0.691 | -2.196 | -3.514 | -4.300 | -1.040 | -2.542 | -2.698 | Rh_Pd_111_1L |
| -0.754 | -2.093 | -3.275 | -4.083 | -0.575 | -2.187 | -2.600 | Rh_Pt_111_1L |
| -0.959 | -2.736 | -4.465 | -5.356 | -1.732 | -2.736 | -2.672 | Rh_Ir_111_1L |
| -0.337 | -1.592 | -2.261 | -2.299 | -0.151 | -2.342 | -2.100 | Ag_Au_111_2  |
| -0.481 | -2.345 | -3.411 | -3.462 | -1.380 | -3.248 | -2.356 | Ag_Cu_111_2  |
| -0.601 | -2.250 | -3.305 | -3.882 | -0.994 | -2.725 | -2.890 | Ag_Pd_111_2  |
| -0.595 | -2.409 | -3.670 | -4.533 | -1.169 | -2.675 | -2.990 | Ag_Pt_111_2  |
| -0.939 | -3.026 | -4.693 | -6.063 | -2.159 | -3.354 | -3.137 | Ag_Ir_111_2  |
| -0.912 | -3.082 | -4.650 | -6.040 | -2.283 | -3.292 | -2.962 | Ag_Rh_111_2  |
| -0.450 | -1.584 | -2.324 | -2.292 | 0.026  | -2.314 | -2.210 | Au_Ag_111_2  |
| -0.686 | -2.295 | -3.221 | -3.146 | -0.945 | -3.059 | -2.353 | Au_Cu_111_2  |
| -0.784 | -2.248 | -3.336 | -3.955 | -0.760 | -2.530 | -2.823 | Au_Pd_111_2  |
| -0.855 | -2.555 | -3.749 | -4.527 | -0.989 | -2.525 | -2.908 | Au_Pt_111_2  |
| -1.229 | -3.170 | -4.582 | -5.847 | -1.889 | -3.206 | -3.062 | Au_Ir_111_2  |
| -1.137 | -3.109 | -4.525 | -5.799 | -1.925 | -3.168 | -2.864 | Au_Rh_111_2  |
| -0.416 | -2.028 | -3.364 | -3.520 | -1.303 | -2.893 | -2.324 | Cu_Ag_111_2  |
| -0.442 | -1.748 | -3.173 | -3.293 | -1.128 | -2.846 | -2.241 | Cu_Au_111_2  |
| -0.515 | -2.159 | -3.419 | -3.919 | -1.246 | -2.830 | -2.694 | Cu_Pd_111_2  |
| -0.472 | -2.209 | -3.487 | -4.170 | -1.108 | -2.595 | -2.673 | Cu_Pt_111_2  |
| -0.828 | -2.832 | -4.202 | -5.265 | -1.912 | -3.109 | -2.989 | Cu_Ir_111_2  |
| -0.830 | -2.848 | -4.273 | -5.257 | -1.935 | -3.080 | -2.859 | Cu_Rh_111_2  |

---

---

|        |        |        |        |        |        |        |             |
|--------|--------|--------|--------|--------|--------|--------|-------------|
| -0.782 | -2.467 | -3.505 | -5.059 | -1.067 | -2.714 | -2.985 | Pd_Ag_111_2 |
| -0.789 | -2.367 | -3.458 | -4.211 | -0.855 | -2.566 | -2.757 | Pd_Au_111_2 |
| -0.854 | -2.621 | -4.049 | -4.736 | -1.548 | -2.997 | -2.950 | Pd_Cu_111_2 |
| -0.928 | -2.721 | -4.383 | -5.212 | -1.574 | -2.698 | -2.992 | Pd_Pt_111_2 |
| -1.137 | -3.087 | -4.851 | -5.995 | -2.110 | -3.117 | -2.970 | Pd_Ir_111_2 |
| -1.145 | -3.205 | -4.997 | -6.152 | -2.336 | -3.292 | -2.985 | Pd_Rh_111_2 |
| -0.860 | -2.434 | -3.533 | -4.378 | -1.264 | -2.538 | -2.771 | Pt_Ag_111_2 |
| -0.872 | -2.340 | -3.511 | -4.292 | -1.124 | -2.349 | -2.735 | Pt_Au_111_2 |
| -0.986 | -2.699 | -4.285 | -5.099 | -1.402 | -2.943 | -2.845 | Pt_Cu_111_2 |
| -0.906 | -2.501 | -4.160 | -4.964 | -1.222 | -2.496 | -2.835 | Pt_Pd_111_2 |
| -1.245 | -3.036 | -4.674 | -5.569 | -1.848 | -2.931 | -2.865 | Pt_Ir_111_2 |
| -1.138 | -2.937 | -4.664 | -5.587 | -1.937 | -3.010 | -2.883 | Pt_Rh_111_2 |
| -0.953 | -2.753 | -4.582 | -5.653 | -1.522 | -2.860 | -2.738 | Ir_Ag_111_2 |
| -0.975 | -2.681 | -4.479 | -5.458 | -1.815 | -2.723 | -2.691 | Ir_Au_111_2 |
| -1.061 | -2.958 | -4.321 | -5.185 | -1.870 | -3.018 | -2.827 | Ir_Cu_111_2 |
| -1.016 | -2.856 | -4.356 | -5.176 | -1.765 | -2.902 | -2.831 | Ir_Pd_111_2 |
| -0.993 | -2.759 | -4.248 | -5.024 | -1.562 | -2.785 | -2.702 | Ir_Pt_111_2 |
| -0.976 | -2.822 | -4.586 | -5.447 | -1.969 | -2.954 | -2.890 | Ir_Rh_111_2 |
| -0.922 | -2.805 | -4.678 | -5.821 | -2.175 | -3.084 | -2.886 | Rh_Ag_111_2 |
| -0.948 | -2.128 | -3.809 | -5.623 | -2.058 | -3.011 | -2.852 | Rh_Au_111_2 |
| -0.987 | -2.966 | -4.365 | -5.369 | -2.020 | -3.202 | -2.865 | Rh_Cu_111_2 |
| -0.955 | -2.625 | -4.376 | -5.262 | -1.898 | -3.133 | -2.863 | Rh_Pd_111_2 |
| -0.972 | -2.827 | -4.319 | -5.245 | -1.734 | -3.028 | -2.762 | Rh_Pt_111_2 |
| -0.967 | -2.900 | -4.641 | -5.648 | -2.073 | -3.036 | -2.820 | Rh_Ir_111_2 |
| -0.349 | -1.578 | -2.270 | -2.394 | -0.139 | -2.319 | -2.120 | Ag_Au_111_3 |
| -0.507 | -2.442 | -3.795 | -3.901 | -1.764 | -3.451 | -2.483 | Ag_Cu_111_3 |
| -0.587 | -2.301 | -3.902 | -4.708 | -1.422 | -2.834 | -3.003 | Ag_Pd_111_3 |
| -0.504 | -2.230 | -4.115 | -5.140 | -1.286 | -2.715 | -2.808 | Ag_Pt_111_3 |
| -1.075 | -3.033 | -5.106 | -6.615 | -2.475 | -3.611 | -3.205 | Ag_Ir_111_3 |
| -0.991 | -3.925 | -5.436 | -7.062 | -2.842 | -3.378 | -3.032 | Ag_Rh_111_3 |
| -0.447 | -1.596 | -2.324 | -2.288 | -0.018 | -2.536 | -2.204 | Au_Ag_111_3 |
| -0.750 | -2.524 | -3.629 | -3.583 | -1.495 | -3.531 | -2.470 | Au_Cu_111_3 |
| -0.802 | -2.366 | -3.968 | -4.761 | -1.317 | -2.821 | -2.976 | Au_Pd_111_3 |
| -0.813 | -2.454 | -4.336 | -5.232 | -1.331 | -2.462 | -2.863 | Au_Pt_111_3 |
| -1.354 | -3.163 | -5.101 | -6.496 | -2.124 | -3.295 | -3.134 | Au_Ir_111_3 |
| -1.235 | -3.183 | -5.370 | -6.884 | -2.667 | -3.358 | -3.059 | Au_Rh_111_3 |
| -0.371 | -1.953 | -3.300 | -3.471 | -1.237 | -2.820 | -2.283 | Cu_Ag_111_3 |
| -0.430 | -1.866 | -2.992 | -3.111 | -0.957 | -2.713 | -2.207 | Cu_Au_111_3 |
| -0.475 | -2.073 | -3.397 | -4.027 | -1.105 | -2.879 | -2.678 | Cu_Pd_111_3 |
| -0.435 | -2.011 | -3.385 | -4.186 | -0.942 | -2.406 | -2.565 | Cu_Pt_111_3 |
| -0.891 | -2.822 | -4.599 | -5.693 | -2.077 | -3.069 | -3.022 | Cu_Ir_111_3 |
| -0.875 | -2.804 | -4.699 | -5.820 | -2.165 | -3.073 | -2.903 | Cu_Rh_111_3 |
| -0.737 | -2.437 | -3.410 | -5.010 | -1.514 | -2.709 | -2.999 | Pd_Ag_111_3 |
| -0.751 | -2.299 | -3.323 | -4.107 | -1.286 | -2.510 | -2.727 | Pd_Au_111_3 |

---



---

|        |        |        |        |        |        |        |             |
|--------|--------|--------|--------|--------|--------|--------|-------------|
| -0.815 | -2.623 | -4.020 | -4.674 | -1.535 | -3.130 | -2.931 | Pd_Cu_111_3 |
| -0.926 | -2.660 | -4.403 | -5.218 | -1.562 | -2.672 | -3.007 | Pd_Pt_111_3 |
| -1.115 | -3.036 | -4.865 | -6.057 | -2.107 | -3.108 | -2.993 | Pd_Ir_111_3 |
| -1.130 | -3.146 | -5.208 | -6.425 | -2.496 | -3.303 | -2.976 | Pd_Rh_111_3 |
| -0.878 | -2.546 | -4.270 | -5.107 | -1.399 | -2.638 | -2.876 | Pt_Ag_111_3 |
| -0.862 | -2.374 | -4.056 | -4.227 | -1.153 | -2.379 | -2.749 | Pt_Au_111_3 |
| -0.930 | -2.737 | -4.327 | -5.151 | -1.452 | -3.208 | -2.851 | Pt_Cu_111_3 |
| -0.880 | -2.511 | -4.223 | -5.034 | -1.232 | -2.515 | -2.837 | Pt_Pd_111_3 |
| -1.227 | -2.989 | -4.813 | -5.851 | -1.986 | -2.880 | -2.872 | Pt_Ir_111_3 |
| -1.141 | -3.031 | -4.965 | -5.989 | -2.327 | -3.038 | -2.946 | Pt_Rh_111_3 |
| -1.026 | -2.894 | -4.854 | -5.958 | -2.180 | -3.000 | -2.856 | Ir_Ag_111_3 |
| -1.032 | -2.774 | -4.623 | -5.609 | -1.963 | -2.803 | -2.794 | Ir_Au_111_3 |
| -1.157 | -3.109 | -4.927 | -6.064 | -2.247 | -3.166 | -2.921 | Ir_Cu_111_3 |
| -1.015 | -2.902 | -4.273 | -5.118 | -2.099 | -2.945 | -2.822 | Ir_Pd_111_3 |
| -1.006 | -2.777 | -4.141 | -4.951 | -1.887 | -2.807 | -2.679 | Ir_Pt_111_3 |
| -0.977 | -2.841 | -4.620 | -5.475 | -2.040 | -3.070 | -2.926 | Ir_Rh_111_3 |
| -0.881 | -2.851 | -4.808 | -5.920 | -2.302 | -3.134 | -2.925 | Rh_Ag_111_3 |
| -0.932 | -2.710 | -4.611 | -5.621 | -2.083 | -3.007 | -2.867 | Rh_Au_111_3 |
| -0.985 | -2.993 | -4.384 | -6.097 | -2.058 | -3.253 | -2.850 | Rh_Cu_111_3 |
| -0.951 | -2.880 | -4.314 | -5.671 | -1.836 | -3.168 | -2.807 | Rh_Pd_111_3 |
| -0.984 | -2.833 | -4.282 | -5.229 | -1.968 | -3.037 | -2.756 | Rh_Pt_111_3 |
| -0.969 | -2.912 | -4.691 | -5.665 | -2.113 | -3.046 | -2.828 | Rh_Ir_111_3 |
| -1.270 | -3.560 | -4.710 | -5.480 | -2.150 | -3.540 | -2.970 | Ir_100      |
| -0.600 | -2.630 | -4.110 | -4.700 | -2.000 | -3.350 | -2.430 | Cu_100      |
| -0.790 | -2.710 | -4.090 | -5.070 | -1.200 | -2.760 | -2.770 | Pd_100      |
| -1.090 | -3.200 | -3.830 | -4.610 | -1.310 | -3.070 | -2.910 | Pt_100      |
| -1.020 | -3.300 | -5.040 | -5.890 | -2.280 | -3.370 | -2.850 | Rh_100      |
| -0.380 | -1.980 | -2.820 | -2.920 | -0.870 | -2.930 | -1.980 | Ag_100      |
| -0.500 | -2.110 | -2.460 | -2.550 | -0.020 | -2.210 | -2.330 | Au_100      |
| -0.300 | -1.640 | -2.240 | -1.960 | -0.250 | -2.590 | -2.060 | Ag_111      |
| -0.330 | -1.480 | -2.280 | -2.370 | 0.190  | -1.890 | -2.180 | Au_111      |
| -0.950 | -2.710 | -4.440 | -5.300 | -1.750 | -2.730 | -2.710 | Ir_111      |
| -0.480 | -2.190 | -3.420 | -3.540 | -1.380 | -3.030 | -2.480 | Cu_111      |
| -0.830 | -2.540 | -4.240 | -5.050 | -1.550 | -2.750 | -2.970 | Pd_111      |
| -0.890 | -2.410 | -4.020 | -4.810 | -1.120 | -2.350 | -2.730 | Pt_111      |
| -0.970 | -2.900 | -4.640 | -5.670 | -2.130 | -3.140 | -2.850 | Rh_111      |

---

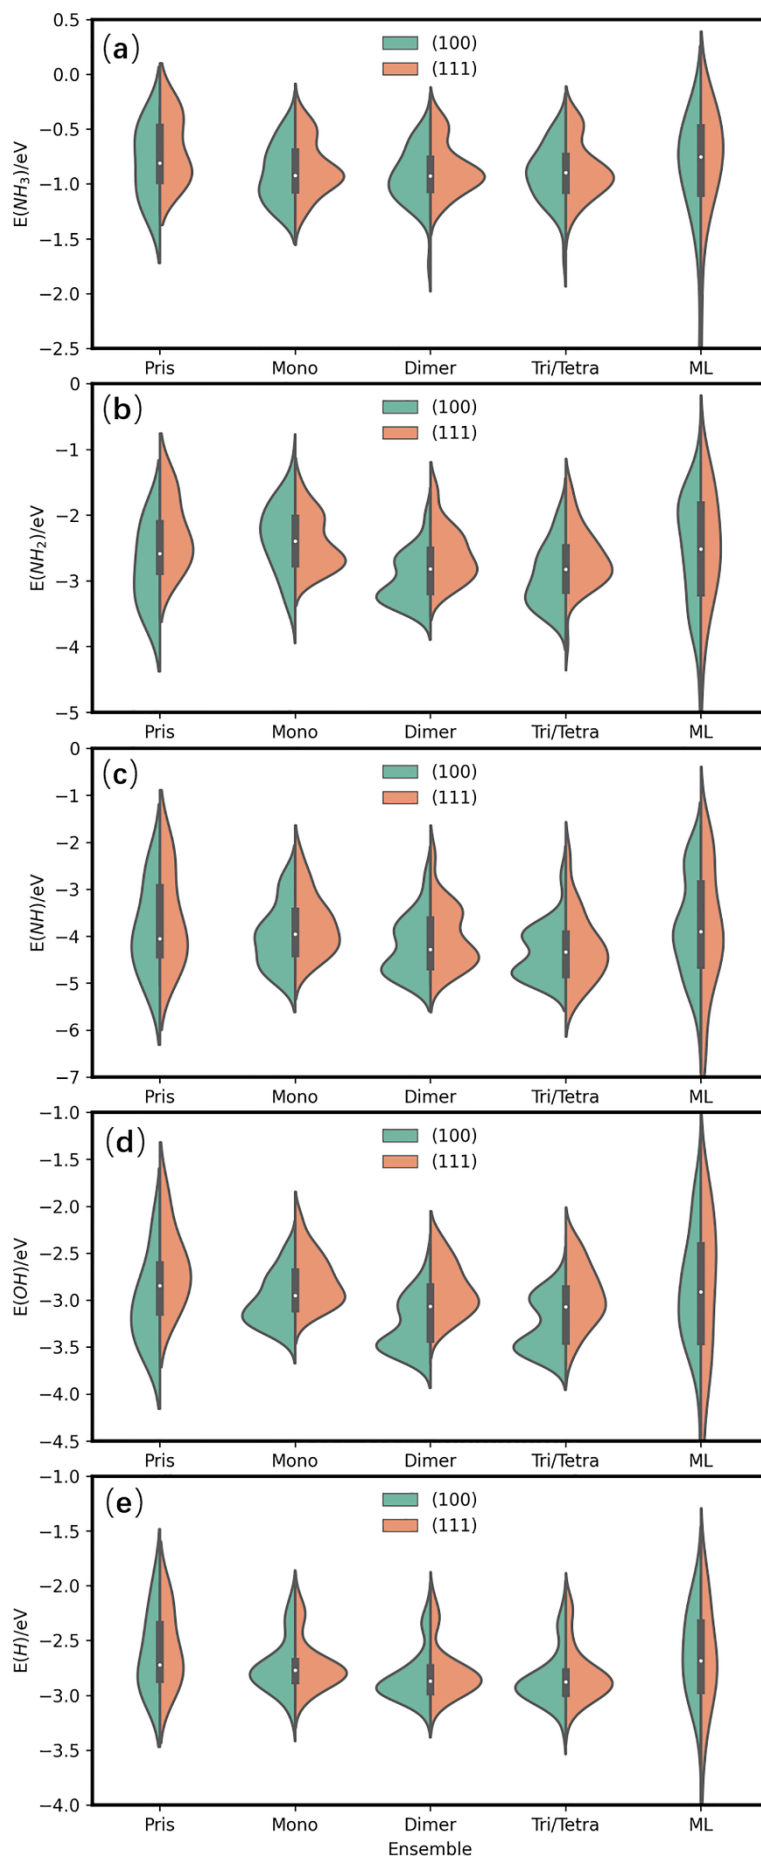

Fig. S3. The violin plots of E(N) and E(O) on different ensembles of (100) and (111) (Pris: pristine systems; Mono: monomer; Dimer: dimer; Tri: trimer; Tetra: tetramer; ML: monolayer).

Table S6. The predictive performance of 1<sup>st</sup> and 2<sup>nd</sup> K-means analysis.

| Model                   | Number of clusters | Data type | Silhouette score | Calinski harabasz score |
|-------------------------|--------------------|-----------|------------------|-------------------------|
| 1 <sup>st</sup> K-means | 3                  | train     | 0.52             | 647.62                  |
|                         |                    | test      | 0.49             | 121.40                  |
| 2 <sup>nd</sup> K-means | 3                  | train     | 0.45             | 98.07                   |
|                         |                    | test      | 0.37             | 21.85                   |

Table S7. Three clusters of 1<sup>st</sup> clustering analysis on catalytic performance.

| C <sub>11</sub> |          |              | C <sub>12</sub> |          |              | C <sub>13</sub> |          |              |
|-----------------|----------|--------------|-----------------|----------|--------------|-----------------|----------|--------------|
| -1.44975        | 0.020584 | Center       | 2.955782        | 0.111276 | Center       | 0.229632        | -0.00847 | Center       |
| -1.78224        | 0.11796  | Ir_Rh_100_1  | 2.279763        | 0.547182 | Au_Ag_100_1L | 1.223694        | 0.48595  | Cu_Ag_111_1  |
| -0.75286        | -0.43313 | Pd_Pt_111_2  | 3.161614        | 0.411886 | Ir_Ag_111_1L | -0.02343        | -0.36183 | Pt_Cu_100_1  |
| -1.48079        | -0.18545 | Cu_Ir_111_3  | 3.412524        | 0.014034 | Au_Ag_111_2  | 0.412309        | -0.03963 | Au_Pd_100_4  |
| -0.85983        | -0.13322 | Ir_Pd_111_2  | 2.5849          | 0.104306 | Au_Ag_100_1  | -0.08766        | 1.036574 | Pt_Cu_111_1L |
| -1.37753        | -0.19892 | Rh_Au_111_3  | 4.17748         | -0.34715 | Rh_Au_111_1L | 0.440167        | -0.38606 | Pt_Au_111_3  |
| -1.0644         | -0.22487 | Ir_Rh_111_1  | 2.542515        | 0.139231 | Au_Cu_111_1  | 0.394689        | 0.871304 | Ag_Cu_111_3  |
| -1.95484        | 0.369606 | Pt_Ir_100_4  | 2.204513        | 0.635585 | Ag_100       | -0.50729        | -0.3605  | Pd_111       |
| -1.18791        | 0.114321 | Rh_Cu_111_2  | 3.591309        | -0.13556 | Au_Ag_111_1  | 0.091984        | -0.26454 | Pd_Au_100_4  |
| -0.87238        | -0.33929 | Ir_111       | 3.882306        | 0.36107  | Pd_Ag_111_1L | 0.233847        | 0.765854 | Pd_Cu_111_1L |
| -0.81361        | 0.314899 | Ag_Ir_100_1  | 2.436073        | 0.40163  | Ag_Au_100_2  | -0.58881        | -0.26009 | Pt_Cu_111_2  |
| -1.9498         | 0.184436 | Rh_Ag_100_2  | 3.195895        | -0.16048 | Ag_Au_100_1L | 0.006255        | -0.3889  | Pt_Pd_111_1L |
| -0.94545        | 0.033125 | Rh_Pt_111_3  | 3.552027        | -0.39526 | Pd_Au_100_1L | 0.345905        | -0.40377 | Cu_Pd_100_1L |
| -1.47722        | 0.192546 | Ir_Au_100_2  | 3.543563        | -0.58008 | Ir_Au_100_1L | 0.056381        | -0.20445 | Rh_Pd_100_1L |
| -1.38765        | -0.25869 | Ir_Ag_100_1  | 3.643898        | 0.317417 | Rh_Ag_111_1L | 0.156117        | 0.272205 | Ag_Rh_100_1  |
| -1.96843        | 0.393214 | Pd_Ir_100_4  | 3.390938        | 0.136375 | Ag_Au_111_2  | -0.2162         | 0.218793 | Cu_Pt_100_2  |
| -1.82094        | -0.29374 | Ir_Ag_111_3  | 3.617624        | -0.31903 | Pt_Au_100_1L | 0.463627        | -0.6904  | Pt_Au_100_1  |
| -1.80718        | 0.231731 | Pt_Rh_100_4  | 4.407026        | -0.46551 | Pd_Au_111_1L | -0.23671        | 0.121496 | Pd_Cu_111_3  |
| -1.92838        | -0.23272 | Pd_Ir_111_2  | 2.573993        | 0.353652 | Ag_Au_100_4  | 1.297605        | -0.68832 | Rh_Pt_111_1L |
| -1.21389        | -0.42291 | Ag_Pt_111_1L | 3.769671        | -0.39607 | Ag_Au_111_1L | -0.45342        | -0.0594  | Pd_Pt_100_2  |
| -1.42759        | -0.11423 | Rh_Au_100_4  | 2.061502        | 0.484938 | Au_Cu_100_1  | 0.385653        | -0.52349 | Pd_Ag_100_1  |
| -2.1994         | 0.18634  | Pd_Rh_100_1L | 1.986689        | -0.55861 | Cu_Pd_111_1L | 0.052977        | -0.02592 | Au_Pt_100_2  |
| -1.41923        | -0.19773 | Pt_Rh_111_2  | 3.493002        | 0.212035 | Ag_Au_111_1  | 0.346378        | -0.45552 | Au_Pt_111_2  |
| -2.04497        | 0.211164 | Rh_Pd_100_2  | 2.237004        | 0.161219 | Cu_Ag_100_1L | 0.418729        | 0.377759 | Cu_Ag_100_1  |
| -1.88233        | 0.439522 | Ag_Ir_100_4  | 2.458241        | -0.23919 | Cu_Au_100_1L | 0.315797        | 0.583225 | Cu_Ag_100_2  |
| -1.75145        | 0.255079 | Pd_Rh_100_2  | 2.22912         | 0.622624 | Au_Ag_100_4  | 1.469886        | -0.04643 | Au_Pt_100_1  |
| -1.28814        | -0.22186 | Rh_Pt_100_1  | 1.917985        | 0.237309 | Ag_Pd_100_1  | -0.23769        | -0.09906 | Au_Ir_111_1  |
| -1.25552        | -0.00771 | Pd_Ir_100_1  | 3.514852        | 0.378027 | Pt_Ag_111_1L | -0.01673        | -0.17935 | Pd_Ag_100_2  |
| -2.04166        | 0.212258 | Cu_Rh_100_4  | 1.995159        | 0.345986 | Cu_Au_111_3  | 0.837391        | -0.20082 | Cu_Pt_111_2  |

|          |          |              |          |          |              |          |          |              |
|----------|----------|--------------|----------|----------|--------------|----------|----------|--------------|
| -1.32051 | 0.039658 | Cu_Ir_100_1  | 2.216994 | 0.727008 | Ag_Cu_111_1  | -0.36139 | 0.034359 | Pt_Ag_100_2  |
| -0.69203 | 0.254128 | Au_Ir_100_1  | 2.507407 | 0.199831 | Au_Ag_100_2  | 0.430905 | 0.513669 | Pt_Cu_100_1L |
| -0.79445 | -0.1582  | Au_Pt_100_1L | 3.366032 | 0.54015  | Au_Ag_111_1L | -0.11502 | 0.407205 | Cu_Pd_100_2  |
| -1.98612 | 0.095996 | Rh_Ag_100_4  | 3.947403 | -0.48684 | Pt_Au_111_1L | 0.853372 | 0.40266  | Cu_Au_100_4  |
| -1.52759 | -0.05953 | Rh_111       | 3.351734 | 0.192407 | Au_Ag_111_3  | 0.723213 | 0.98735  | Au_Cu_111_3  |
| -1.72249 | 0.450597 | Ir_Pt_100_4  | 1.720831 | 0.371425 | Cu_Au_111_2  | 0.830306 | -0.14488 | Pd_Au_111_3  |
| -1.6993  | -0.13302 | Rh_Pd_100_1  | 3.924108 | -0.31717 | Ir_Au_111_1L | 0.601604 | -0.59547 | Pd_Au_100_1  |
| -0.77326 | 0.878836 | Ag_Cu_100_1L | 2.448793 | 0.156053 | Ag_Pd_111_1  | -0.05895 | 0.855538 | Rh_Cu_111_1L |
| -0.909   | -0.08402 | Rh_Pt_111_1  | 1.747593 | -0.36513 | Au_Pt_111_1  | 1.129258 | 0.549111 | Cu_111       |
| -1.76986 | 0.130458 | Rh_Pt_100_4  | 2.997349 | -0.04938 | Au_100       | 1.509493 | 0.426318 | Cu_Au_111_1  |
| -1.01305 | -0.40165 | Ir_Au_111_2  | 2.973876 | 0.360875 | Rh_Ag_100_1L | -0.23595 | -0.02727 | Cu_Pt_100_4  |
| -1.65555 | 0.26005  | Cu_Ir_100_2  | 3.535768 | 0.536351 | Ag_111       | 0.014937 | -0.22697 | Ag_Pd_111_3  |
| -1.90741 | 0.14729  | Ir_Ag_100_4  | 2.627026 | 0.239901 | Ag_Au_100_1  | -0.48341 | -0.24891 | Ir_Pt_111_1  |
| -2.29931 | 0.406091 | Pt_Ir_100_1L | 2.91676  | 0.30056  | Ir_Ag_100_1L | 1.448378 | 0.056887 | Ag_Pt_100_1  |
| -1.04933 | 0.199185 | Ag_Pt_100_1L | 3.103742 | 0.514145 | Pt_Ag_100_1L | -0.33295 | -0.21331 | Pt_Ag_100_4  |
| -1.39392 | -0.15387 | Rh_Ir_111_1  | 3.332026 | 0.061097 | Ag_Au_111_3  | 0.262951 | 0.030234 | Ag_Pd_100_4  |
| -0.9213  | 0.133164 | Rh_Cu_111_1  | 2.402808 | -0.44171 | Au_Pd_111_1  | 0.534485 | -0.45634 | Cu_Pt_100_1L |
| -1.59189 | -0.11096 | Ir_Rh_100_1L | 3.624041 | -0.53094 | Rh_Au_100_1L | -0.32508 | -0.4174  | Pd_100       |
| -0.94965 | 0.015248 | Ir_Cu_111_2  | 2.276361 | -0.04369 | Au_Pd_100_1  | 1.403875 | 0.662451 | Ag_Cu_100_1  |
| -0.72016 | -0.07079 | Pt_Cu_111_3  | 3.581864 | -0.39913 | Au_111       | -0.05121 | -0.30034 | Au_Pd_111_3  |
| -0.99087 | -0.34589 | Cu_Rh_111_1L | 1.616425 | 0.62677  | Au_Cu_111_2  | 0.693949 | -0.55072 | Ir_Pt_100_1L |
| -1.68711 | -0.05877 | Ir_Cu_100_1  | 1.813355 | -0.06502 | Ag_Pt_111_1  | 0.100794 | 0.223938 | Cu_Pd_100_1  |
| -1.6889  | 0.142699 | Ir_Ag_100_2  | 3.08377  | 0.487824 | Pd_Ag_100_1L | 1.445651 | 0.359324 | Cu_Ag_111_3  |
| -1.97972 | 0.352967 | Ir_Rh_100_2  |          |          |              | -0.48513 | -0.74518 | Cu_Ir_111_1L |
| -1.40164 | -0.25778 | Pt_Ir_111_2  |          |          |              | 0.225549 | -0.18958 | Pd_Au_100_2  |
| -1.83908 | 0.192641 | Rh_Ir_100_1L |          |          |              | -0.55462 | 0.154327 | Pt_Cu_100_2  |
| -1.68131 | -0.17397 | Au_Ir_111_2  |          |          |              | 0.941548 | 0.124899 | Cu_Pd_111_2  |
| -1.42975 | -0.07287 | Ir_Pt_100_1  |          |          |              | 0.830758 | -0.4394  | Pd_Au_111_1  |
| -0.66526 | -0.1638  | Ir_Pd_111_1  |          |          |              | 1.031233 | 0.249542 | Ag_Pd_100_2  |
| -1.68617 | -0.39277 | Pt_Ir_111_3  |          |          |              | 1.058801 | -0.43659 | Cu_Pt_111_3  |
| -1.92031 | 0.15405  | Rh_Au_100_2  |          |          |              | 0.047356 | 0.400224 | Pd_Cu_100_1L |
| -1.53867 | -0.17285 | Rh_Ag_100_1  |          |          |              | -0.37051 | -0.14149 | Au_Pd_111_1L |
| -1.82723 | -0.14341 | Rh_Ag_111_3  |          |          |              | -0.10185 | 0.250715 | Rh_Cu_100_1L |
| -1.19759 | -0.21159 | Ir_Au_100_1  |          |          |              | -0.33114 | 0.109335 | Au_Pt_100_4  |
| -2.36898 | 0.307885 | Au_Ir_100_4  |          |          |              | -0.00341 | 0.634811 | Au_Cu_100_1L |
| -1.81265 | 0.30328  | Pt_Ir_100_2  |          |          |              | -0.42114 | -0.08129 | Pd_Pt_100_4  |
| -0.60344 | 1.247798 | Ag_Cu_111_1L |          |          |              | -0.21234 | -0.04422 | Pd_Cu_100_2  |
| -1.38713 | 0.323016 | Pt_Rh_100_2  |          |          |              | 1.115858 | 0.801839 | Ag_Cu_111_2  |
| -0.95441 | 0.031953 | Cu_Rh_111_2  |          |          |              | 0.348619 | 0.029902 | Au_Rh_100_1  |
| -1.69054 | -0.17606 | Pd_Ir_111_1  |          |          |              | 1.128718 | -0.31263 | Au_Pd_111_2  |
| -2.13657 | 0.352478 | Ir_Cu_100_4  |          |          |              | -0.47218 | -0.24011 | Pt_Rh_100_1  |
| -1.86665 | 0.264616 | Pd_Ir_100_2  |          |          |              | -0.22824 | -0.71364 | Pd_Pt_111_1L |
| -0.95399 | -0.02598 | Rh_Pd_111_2  |          |          |              | -0.09865 | -0.17818 | Ir_Ag_111_1  |
| -0.93726 | 0.016569 | Cu_Ir_111_2  |          |          |              | 0.810599 | 0.265893 | Cu_Au_100_1  |

|          |          |              |          |          |              |
|----------|----------|--------------|----------|----------|--------------|
| -0.74048 | -0.47964 | Pd_Pt_111_3  | -0.20851 | -0.61993 | Pt_Pd_111_2  |
| -1.52329 | -0.12538 | Rh_Ir_111_3  | -0.19166 | 0.066427 | Pt_Au_100_2  |
| -1.5551  | 0.280727 | Cu_Au_111_1L | 0.072554 | 0.05022  | Cu_Pt_100_1  |
| -2.14472 | 0.247899 | Rh_Cu_100_2  | 0.168673 | 0.124066 | Ag_Rh_111_1  |
| -0.92147 | -0.25538 | Pd_Rh_100_1  | -0.35912 | 0.011161 | Pt_Pd_100_4  |
| -0.66053 | 0.110793 | Ag_Ir_111_1  | 0.28776  | -0.60079 | Pt_Ag_100_1  |
| -1.77404 | 0.456309 | Ir_100       | 0.632008 | -0.28728 | Ir_Pd_100_1L |
| -1.19463 | -0.37603 | Au_Pt_111_1L | 0.34913  | 0.059628 | Ir_Cu_100_1L |
| -2.25604 | 0.264321 | Rh_Ir_100_4  | 0.715543 | -0.45178 | Pt_Ag_111_1  |
| -2.08001 | 0.201568 | Pd_Rh_100_4  | 0.68435  | -0.42286 | Pt_Au_111_2  |
| -1.30827 | -0.3613  | Ir_Au_111_3  | -0.52351 | 1.348645 | Au_Cu_111_1L |
| -1.87918 | 0.184438 | Ag_Rh_100_4  | 1.372627 | 0.058838 | Au_Pd_100_2  |
| -1.59756 | -0.21871 | Pd_Rh_111_1  | -0.09303 | -0.62877 | Pt_Pd_111_1  |
| -1.73667 | -0.10414 | Rh_Cu_100_1  | 1.307237 | 0.420885 | Cu_Ag_111_2  |
| -0.6766  | -0.41815 | Pd_Pt_111_1  | -0.33305 | 0.148185 | Cu_Rh_111_1  |
| -1.81536 | 0.039338 | Au_Rh_100_2  | 0.174252 | -0.15256 | Pt_Pd_100_1L |
| -1.94999 | 0.393641 | Ir_Pd_100_4  | -0.10331 | -0.16669 | Pd_Cu_111_1  |
| -1.84653 | -0.14575 | Rh_Ir_100_1  | 0.535605 | -0.19689 | Au_Rh_111_1  |
| -1.73868 | 0.286271 | Rh_Pt_100_2  | -0.235   | -0.56959 | Ag_Pt_111_3  |
| -1.62364 | -0.19696 | Cu_Rh_111_3  | 0.166618 | -0.24845 | Ir_Au_111_1  |
| -1.70756 | 0.268658 | Ir_Au_100_4  | -0.20564 | 0.174952 | Pt_100       |
| -0.9187  | -0.35817 | Rh_Ir_111_1L | 0.963408 | -0.00758 | Cu_Pt_111_1  |
| -1.2457  | -0.14053 | Rh_Pd_111_3  | -0.54341 | 0.781383 | Ag_Cu_100_4  |
| -0.81633 | -0.31549 | Rh_Au_111_2  | 0.745932 | -0.35151 | Rh_Pd_111_1L |
| -1.47126 | 0.040083 | Ir_Rh_111_1L | -0.55117 | -0.22286 | Ir_Pt_111_2  |
| -2.19748 | 0.28256  | Rh_Ir_100_2  | 0.046502 | -0.5526  | Pd_Ag_111_1  |
| -1.30234 | -0.22512 | Rh_Au_100_1  | -0.48608 | -0.75007 | Au_Pt_111_3  |
| -0.97822 | -0.12177 | Pt_Ir_100_1  | -0.27857 | -0.0028  | Pd_Cu_111_2  |
| -0.63067 | 0.014538 | Cu_Ir_111_1  | 0.13333  | 0.25469  | Cu_Pd_100_4  |
| -1.12698 | -0.51764 | Ir_Ag_111_2  | -0.60019 | -0.01142 | Ir_Cu_111_1  |
| -1.58315 | 0.188782 | Cu_Rh_100_2  | -0.42339 | 0.551276 | Cu_100       |
| -0.87559 | -0.08366 | Rh_Pt_111_2  | -0.23282 | 0.006181 | Au_Pt_100_4  |
| -2.02785 | 0.220096 | Rh_Pd_100_4  | 0.100817 | -0.474   | Rh_Pt_100_1L |
| -2.09482 | 0.138527 | Rh_100       | -0.20618 | 0.954401 | Cu_Ag_111_1L |
| -2.12656 | 0.3029   | Ir_Rh_100_4  | 1.082883 | 0.230547 | Cu_Pd_111_1  |
| -1.84297 | 0.280711 | Ir_Pd_100_2  | -0.02478 | -0.35913 | Pd_Ag_111_3  |
| -1.68521 | 0.371988 | Ir_Pt_100_2  | -0.39071 | #####    | Pd_Cu_100_4  |
| -1.46512 | -0.13957 | Rh_Ir_111_2  | -0.58984 | -0.02067 | Ir_Pt_111_3  |
| -1.95154 | 0.297428 | Ir_Cu_100_2  | -0.22533 | -0.21477 | Pd_Ag_100_4  |
| -0.94404 | 0.161846 | Cu_Rh_100_1  | -0.12896 | -0.00884 | Ag_Pt_100_4  |
| -1.74253 | 0.192132 | Pt_Rh_100_1L | 0.229957 | -0.30577 | Au_Pd_100_1L |
| -0.6906  | 0.159723 | Pt_Cu_100_4  | 0.491588 | -0.25554 | Pt_Ag_111_2  |
| -0.71064 | -0.46346 | Pt_Rh_111_1  | -0.09074 | -0.52637 | Pd_Pt_100_1  |
| -0.90003 | -0.31475 | Pt_Ir_111_1  | 0.052977 | -0.02592 | Au_Pt_100_2  |

|          |          |             |          |          |              |
|----------|----------|-------------|----------|----------|--------------|
| -2.03053 | -0.21204 | Pt_Rh_111_3 | 1.621743 | -0.6702  | Ir_Pt_111_1L |
| -1.56856 | -0.13586 | Au_Rh_111_2 | 0.72904  | 0.534381 | Cu_Au_100_2  |
| -1.62453 | -0.18395 | Rh_Ag_111_2 | 0.266406 | -0.03831 | Ag_Pt_100_2  |
| -0.90166 | -0.05111 | Rh_Pd_111_1 | 0.84457  | -0.27898 | Ir_Pd_111_1L |
| -1.63323 | -0.12543 | Ir_Pd_100_1 | 0.828864 | -0.33502 | Pd_Au_111_2  |
| -0.93616 | 0.084714 | Ir_Pd_111_3 | -0.26023 | 0.069545 | Rh_Au_111_1  |
| -0.89418 | -0.33092 | Rh_Ag_111_1 | -0.08989 | 0.975566 | Ir_Cu_111_1L |
| -1.33316 | -0.0803  | Ir_Rh_111_3 | -0.18053 | -0.08416 | Ag_Pd_100_1L |
| -1.2358  | -0.17374 | Ir_Rh_111_2 | 0.546149 | 0.468645 | Cu_Ag_100_4  |
|          |          |             | 1.073902 | -0.04202 | Ag_Pd_111_2  |
|          |          |             | 0.062926 | -0.56562 | Pd_Ag_111_2  |
|          |          |             | 0.960073 | 0.030149 | Cu_Pd_111_3  |
|          |          |             | -0.22677 | -0.16512 | Pd_Pt_100_1L |
|          |          |             | -0.23401 | -0.24567 | Ag_Pd_111_1L |
|          |          |             | 0.075496 | -0.68692 | Pt_111       |
|          |          |             | -0.47096 | -0.51607 | Pt_Ag_111_3  |
|          |          |             | 0.096279 | -0.50734 | Pt_Pd_100_1  |
|          |          |             | -0.08389 | -0.21434 | Pt_Au_100_4  |
|          |          |             | -0.31375 | -0.51072 | Pt_Cu_111_1  |
|          |          |             | 0.41819  | 0.908041 | Ag_Cu_100_2  |
|          |          |             | 0.343912 | -0.31254 | Ag_Pt_111_2  |
|          |          |             | 1.523707 | -0.89034 | Cu_Pt_111_1L |
|          |          |             | 0.987871 | -0.70674 | Pt_Au_111_1  |
|          |          |             | -0.2927  | -0.63636 | Pt_Pd_111_3  |
|          |          |             | 0.165548 | -0.42319 | Pd_Cu_100_1  |
|          |          |             | -0.40491 | 0.093468 | Pt_Pd_100_2  |

Table S8. Three clusters of 2<sup>nd</sup> clustering analysis on catalytic performance.

| C <sub>21</sub> |          |              | C <sub>22</sub> |          |              | C <sub>23</sub> |          |              |
|-----------------|----------|--------------|-----------------|----------|--------------|-----------------|----------|--------------|
| -0.1131         | -0.21198 | Center       | 0.149029        | 0.668409 | Center       | 1.028499        | -0.12655 | Center       |
| -0.01673        | -0.17935 | Pd_Ag_100_2  | 0.723213        | 0.98735  | Au_Cu_111_3  | 0.941548        | 0.124899 | Cu_Pd_111_2  |
| -0.19166        | 0.066427 | Pt_Au_100_2  | 0.546149        | 0.468645 | Cu_Ag_100_4  | 0.830306        | -0.14488 | Pd_Au_111_3  |
| -0.50729        | -0.3605  | Pd_111       | 0.315797        | 0.583225 | Cu_Ag_100_2  | 1.621743        | -0.6702  | Ir_Pt_111_1L |
| -0.23769        | -0.09906 | Au_Ir_111_1  | -0.05895        | 0.855538 | Rh_Cu_111_1L | 1.523707        | -0.89034 | Cu_Pt_111_1L |
| 0.346378        | -0.45552 | Au_Pt_111_2  | -0.52351        | 1.348645 | Au_Cu_111_1L | 1.129258        | 0.549111 | Cu_111       |
| -0.10331        | -0.16669 | Pd_Cu_111_1  | 0.418729        | 0.377759 | Cu_Ag_100_1  | 1.448378        | 0.056887 | Ag_Pt_100_1  |
| -0.12896        | -0.00884 | Ag_Pt_100_4  | 0.394689        | 0.871304 | Ag_Cu_111_3  | 0.960073        | 0.030149 | Cu_Pd_111_3  |
| -0.55117        | -0.22286 | Ir_Pt_111_2  | -0.08766        | 1.036574 | Pt_Cu_111_1L | 1.058801        | -0.43659 | Cu_Pt_111_3  |
| -0.09303        | -0.62877 | Pt_Pd_111_1  | -0.20618        | 0.954401 | Cu_Ag_111_1L | 1.223694        | 0.48595  | Cu_Ag_111_1  |
| -0.09865        | -0.17818 | Ir_Ag_111_1  | -0.11502        | 0.407205 | Cu_Pd_100_2  | 1.445651        | 0.359324 | Cu_Ag_111_3  |
| -0.48513        | -0.74518 | Cu_Ir_111_1L | 0.41819         | 0.908041 | Ag_Cu_100_2  | 0.68435         | -0.42286 | Pt_Au_111_2  |
| -0.60019        | -0.01142 | Ir_Cu_111_1  | 0.100794        | 0.223938 | Cu_Pd_100_1  | 1.297605        | -0.68832 | Rh_Pt_111_1L |
| 0.056381        | -0.20445 | Rh_Pd_100_1L | 0.72904         | 0.534381 | Cu_Au_100_2  | 0.534485        | -0.45634 | Cu_Pt_100_1L |

|          |          |              |          |          |              |          |          |              |
|----------|----------|--------------|----------|----------|--------------|----------|----------|--------------|
| -0.32508 | -0.4174  | Pd_100       | 0.13333  | 0.25469  | Cu_Pd_100_4  | 0.693949 | -0.55072 | Ir_Pt_100_1L |
| 0.052977 | -0.02592 | Au_Pt_100_2  | 0.156117 | 0.272205 | Ag_Rh_100_1  | 1.031233 | 0.249542 | Ag_Pd_100_2  |
| -0.33295 | -0.21331 | Pt_Ag_100_4  | 0.047356 | 0.400224 | Pd_Cu_100_1L | 0.84457  | -0.27898 | Ir_Pd_111_1L |
| -0.35912 | 0.011161 | Pt_Pd_100_4  | -0.54341 | 0.781383 | Ag_Cu_100_4  | 0.828864 | -0.33502 | Pd_Au_111_2  |
| -0.22677 | -0.16512 | Pd_Pt_100_1L | 0.233847 | 0.765854 | Pd_Cu_111_1L | 0.715543 | -0.45178 | Pt_Ag_111_1  |
| 0.262951 | 0.030234 | Ag_Pd_100_4  | -0.08989 | 0.975566 | Ir_Cu_111_1L | 0.810599 | 0.265893 | Cu_Au_100_1  |
| 0.225549 | -0.18958 | Pd_Au_100_2  | -0.42339 | 0.551276 | Cu_100       | 0.830758 | -0.4394  | Pd_Au_111_1  |
| -0.235   | -0.56959 | Ag_Pt_111_3  | -0.00341 | 0.634811 | Au_Cu_100_1L | 1.115858 | 0.801839 | Ag_Cu_111_2  |
| 0.096279 | -0.50734 | Pt_Pd_100_1  | 0.430905 | 0.513669 | Pt_Cu_100_1L | 1.372627 | 0.058838 | Au_Pd_100_2  |
| 0.006255 | -0.3889  | Pt_Pd_111_1L |          |          |              | 0.853372 | 0.40266  | Cu_Au_100_4  |
| 0.266406 | -0.03831 | Ag_Pt_100_2  |          |          |              | 0.837391 | -0.20082 | Cu_Pt_111_2  |
| 0.28776  | -0.60079 | Pt_Ag_100_1  |          |          |              | 0.963408 | -0.00758 | Cu_Pt_111_1  |
| -0.27857 | -0.0028  | Pd_Cu_111_2  |          |          |              | 0.601604 | -0.59547 | Pd_Au_100_1  |
| -0.47218 | -0.24011 | Pt_Rh_100_1  |          |          |              | 1.128718 | -0.31263 | Au_Pd_111_2  |
| 0.343912 | -0.31254 | Ag_Pt_111_2  |          |          |              | 1.469886 | -0.04643 | Au_Pt_100_1  |
| -0.22533 | -0.21477 | Pd_Ag_100_4  |          |          |              | 1.403875 | 0.662451 | Ag_Cu_100_1  |
| -0.09074 | -0.52637 | Pd_Pt_100_1  |          |          |              | 1.307237 | 0.420885 | Cu_Ag_111_2  |
| -0.20851 | -0.61993 | Pt_Pd_111_2  |          |          |              | 1.509493 | 0.426318 | Cu_Au_111_1  |
| 0.072554 | 0.05022  | Cu_Pt_100_1  |          |          |              | 0.987871 | -0.70674 | Pt_Au_111_1  |
| 0.046502 | -0.5526  | Pd_Ag_111_1  |          |          |              | 0.535605 | -0.19689 | Au_Rh_111_1  |
| 0.075496 | -0.68692 | Pt_111       |          |          |              | 1.073902 | -0.04202 | Ag_Pd_111_2  |
| -0.20564 | 0.174952 | Pt_100       |          |          |              | 0.745932 | -0.35151 | Rh_Pd_111_1L |
| -0.21234 | -0.04422 | Pd_Cu_100_2  |          |          |              | 1.082883 | 0.230547 | Cu_Pd_111_1  |
| -0.45342 | -0.0594  | Pd_Pt_100_2  |          |          |              | 0.491588 | -0.25554 | Pt_Ag_111_2  |
| -0.23595 | -0.02727 | Cu_Pt_100_4  |          |          |              | 0.632008 | -0.28728 | Ir_Pd_100_1L |
| 0.014937 | -0.22697 | Ag_Pd_111_3  |          |          |              |          |          |              |
| -0.08389 | -0.21434 | Pt_Au_100_4  |          |          |              |          |          |              |
| -0.42114 | -0.08129 | Pd_Pt_100_4  |          |          |              |          |          |              |
| 0.385653 | -0.52349 | Pd_Ag_100_1  |          |          |              |          |          |              |
| -0.47096 | -0.51607 | Pt_Ag_111_3  |          |          |              |          |          |              |
| -0.33114 | 0.109335 | Au_Pt_100_4  |          |          |              |          |          |              |
| -0.05121 | -0.30034 | Au_Pd_111_3  |          |          |              |          |          |              |
| 0.091984 | -0.26454 | Pd_Au_100_4  |          |          |              |          |          |              |
| -0.2927  | -0.63636 | Pt_Pd_111_3  |          |          |              |          |          |              |
| -0.37051 | -0.14149 | Au_Pd_111_1L |          |          |              |          |          |              |
| 0.166618 | -0.24845 | Ir_Au_111_1  |          |          |              |          |          |              |
| -0.02343 | -0.36183 | Pt_Cu_100_1  |          |          |              |          |          |              |
| 0.440167 | -0.38606 | Pt_Au_111_3  |          |          |              |          |          |              |
| -0.39071 | #####    | Pd_Cu_100_4  |          |          |              |          |          |              |
| 0.412309 | -0.03963 | Au_Pd_100_4  |          |          |              |          |          |              |
| -0.33305 | 0.148185 | Cu_Rh_111_1  |          |          |              |          |          |              |
| -0.58881 | -0.26009 | Pt_Cu_111_2  |          |          |              |          |          |              |
| -0.18053 | -0.08416 | Ag_Pd_100_1L |          |          |              |          |          |              |
| -0.23671 | 0.121496 | Pd_Cu_111_3  |          |          |              |          |          |              |

|          |          |              |
|----------|----------|--------------|
| -0.10185 | 0.250715 | Rh_Cu_100_1L |
| -0.02478 | -0.35913 | Pd_Ag_111_3  |
| 0.165548 | -0.42319 | Pd_Cu_100_1  |
| -0.2162  | 0.218793 | Cu_Pt_100_2  |
| 0.348619 | 0.029902 | Au_Rh_100_1  |
| -0.55462 | 0.154327 | Pt_Cu_100_2  |
| -0.48608 | -0.75007 | Au_Pt_111_3  |
| 0.34913  | 0.059628 | Ir_Cu_100_1L |
| 0.174252 | -0.15256 | Pt_Pd_100_1L |
| -0.23282 | 0.006181 | Au_Pt_100_4  |
| -0.26023 | 0.069545 | Rh_Au_111_1  |
| 0.052977 | -0.02592 | Au_Pt_100_2  |
| -0.58984 | -0.02067 | Ir_Pt_111_3  |
| 0.100817 | -0.474   | Rh_Pt_100_1L |
| -0.40491 | 0.093468 | Pt_Pd_100_2  |
| 0.463627 | -0.6904  | Pt_Au_100_1  |
| 0.062926 | -0.56562 | Pd_Ag_111_2  |
| 0.229957 | -0.30577 | Au_Pd_100_1L |
| -0.36139 | 0.034359 | Pt_Ag_100_2  |
| -0.22824 | -0.71364 | Pd_Pt_111_1L |
| 0.168673 | 0.124066 | Ag_Rh_111_1  |
| -0.23401 | -0.24567 | Ag_Pd_111_1L |
| -0.31375 | -0.51072 | Pt_Cu_111_1  |
| -0.48341 | -0.24891 | Ir_Pt_111_1  |
| 0.345905 | -0.40377 | Cu_Pd_100_1L |

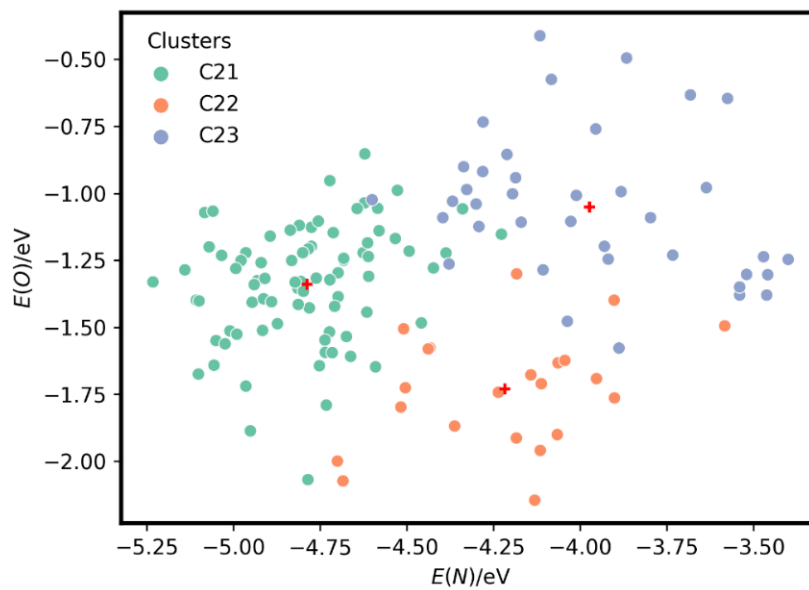

Fig. S4. The distribution of N and O binding energy ( $E(N)$  and  $E(O)$ ) on ensembles in  $C_{21}$ ,  $C_{22}$  and  $C_{23}$  clusters. The average  $E(N)$  and  $E(O)$  of every cluster are denoted with the plus (“+”).



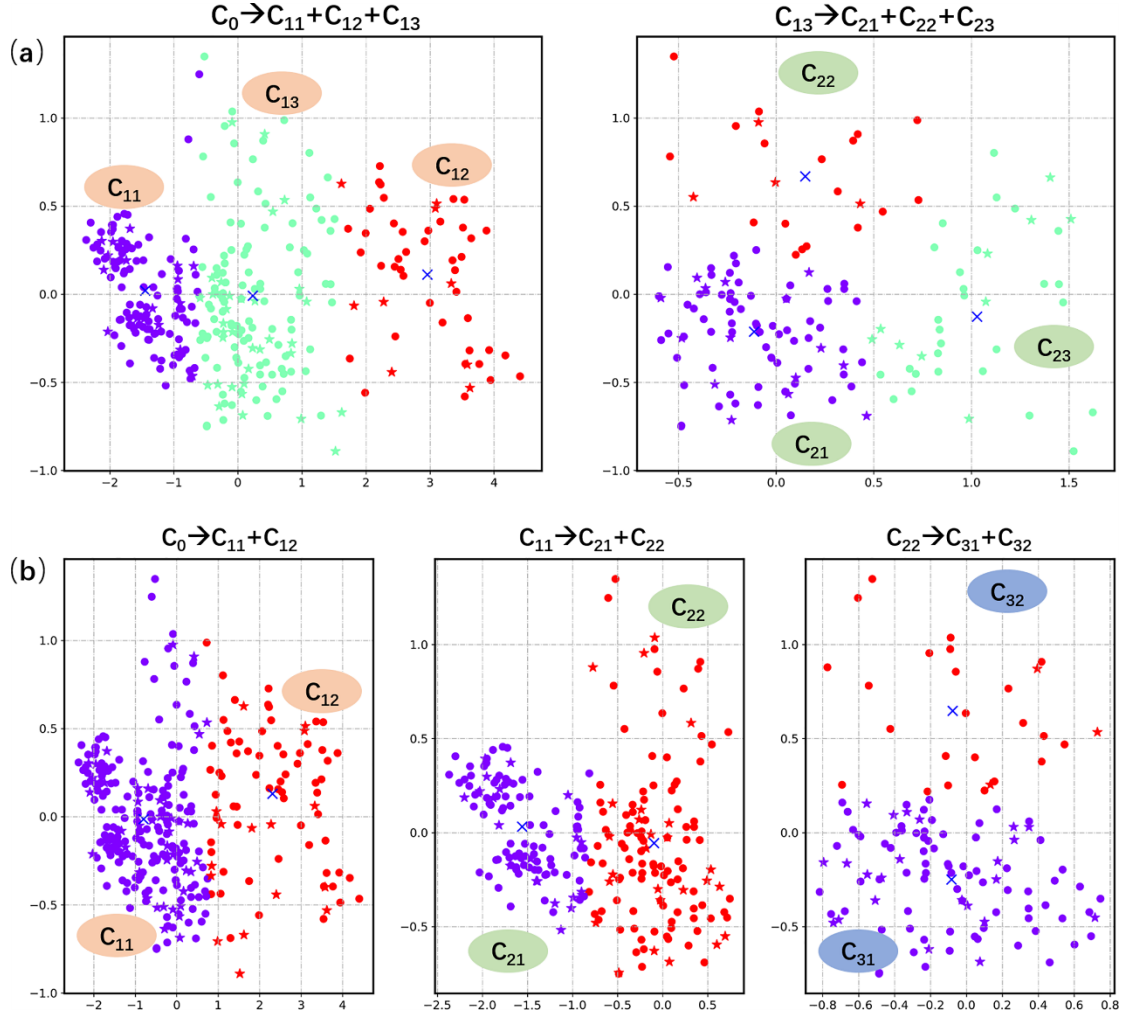

Fig. S5. Different clustering models:(a) twice K-means clustering with 3 and 3 clusters, respectively (K-means-33); (b) three times K-means clustering with 2, 2 and 2 clusters, respectively (K-means-222).

Table S9. The performance of different K-means based clustering models (K-means-33, and K-means-222).

| Clustering Model | Numbers | Data types | Silhouette score | Calinski harabasz score |
|------------------|---------|------------|------------------|-------------------------|
| K-means-33       | 3       | train/test | 0.52/0.49        | 647.62/121.40           |
|                  | 3       | train/test | 0.45/0.37        | 98.07/21.85             |
| K-means-222      | 2       | train/test | 0.59/0.54        | 497.63/94.91            |
|                  | 2       | train/test | 0.55/0.47        | 361.07/64.97            |
|                  | 2       | train/test | 0.41/0.40        | 63.52/11.62             |

Table S10. The detailed systems of  $C_{21}$  and  $C_{31}$  as well as  $C_{22}$  and  $C_{32}$  for K-means-33 and K-means-222 clustering models, respectively.

| Clustering-33 | Clustering-222 | K-means-33   | K-means-222  |
|---------------|----------------|--------------|--------------|
| $C_{21}$      | $C_{31}$       | $C_{22}$     | $C_{32}$     |
| Pd_Ag_100_2   | Pd_Ag_100_2    | Pd_Cu_111_1L | Pd_Cu_111_1L |
| Pt_Au_100_2   | Pt_Au_100_2    | Cu_100       | Cu_100       |
| Pd_111        | Pd_111         | Rh_Cu_111_1L | Rh_Cu_111_1L |
| Au_Ir_111_1   | Au_Ir_111_1    | Au_Cu_111_1L | Au_Cu_111_1L |
| Au_Pt_111_2   | Au_Pt_111_2    | Ag_Cu_100_4  | Ag_Cu_100_4  |
| Pd_Cu_111_1   | Pd_Cu_111_1    | Au_Cu_100_1L | Au_Cu_100_1L |
| Ag_Pt_100_4   | Ag_Pt_100_4    | Ir_Cu_111_1L | Ir_Cu_111_1L |
| Ir_Pt_111_2   | Ir_Pt_111_2    | Cu_Ag_111_1L | Cu_Ag_111_1L |
| Pt_Pd_111_1   | Pt_Pd_111_1    | --           | Ag_Cu_111_1L |
| Ir_Ag_111_1   | Ir_Ag_111_1    | Cu_Ag_100_1  | Cu_Ag_100_1  |
| Cu_Ir_111_1L  | Cu_Ir_111_1L   | Pd_Cu_100_1L | Pd_Cu_100_1L |
| Ir_Cu_111_1   | Ir_Cu_111_1    | Ag_Rh_100_1  | Ag_Rh_100_1  |
| Rh_Pd_100_1L  | Rh_Pd_100_1L   | Pt_Cu_100_1L | Pt_Cu_100_1L |
| Pd_100        | Pd_100         | Pt_Cu_111_1L | Pt_Cu_111_1L |
| Au_Pt_100_2   | Au_Pt_100_2    | Cu_Pd_100_1  | Cu_Pd_100_1  |
| Pt_Ag_100_4   | Pt_Ag_100_4    | Cu_Pd_100_2  | Cu_Pd_100_2  |
| Pt_Pd_100_4   | Pt_Pd_100_4    | Ag_Cu_100_2  | Ag_Cu_100_2  |
| Pd_Pt_100_1L  | Pd_Pt_100_1L   | --           | Ag_Cu_100_1L |
| Ag_Pd_100_4   | Ag_Pd_100_4    | Cu_Ag_100_2  | Cu_Ag_100_2  |
| Pd_Au_100_2   | Pd_Au_100_2    | --           | Rh_Cu_100_1L |
| Ag_Pt_111_3   | Ag_Pt_111_3    | Cu_Ag_100_4  | Cu_Ag_100_4  |
| Pt_Pd_100_1   | Pt_Pd_100_1    | Cu_Au_100_2  | Cu_Au_100_2  |
| Pt_Pd_111_1L  | Pt_Pd_111_1L   | Ag_Cu_111_3  | Ag_Cu_111_3  |
| Ag_Pt_100_2   | Ag_Pt_100_2    | Cu_Pd_100_4  | Cu_Pd_100_4  |
| Pt_Ag_100_1   | Pt_Ag_100_1    | --           | Cu_Pt_100_2  |
| Pd_Cu_111_2   | Pd_Cu_111_2    | --           | Au_Ir_100_1  |
| Pt_Rh_100_1   | Pt_Rh_100_1    | Au_Cu_111_3  | --           |
| Ag_Pt_111_2   | Ag_Pt_111_2    |              |              |
| Pd_Ag_100_4   | Pd_Ag_100_4    |              |              |
| Pd_Pt_100_1   | Pd_Pt_100_1    |              |              |
| Pt_Pd_111_2   | Pt_Pd_111_2    |              |              |
| Cu_Pt_100_1   | Cu_Pt_100_1    |              |              |
| Pd_Ag_111_1   | Pd_Ag_111_1    |              |              |
| Pt_111        | Pt_111         |              |              |
| Pt_100        | Pt_100         |              |              |
| Pd_Cu_100_2   | Pd_Cu_100_2    |              |              |
| Pd_Pt_100_2   | Pd_Pt_100_2    |              |              |
| Cu_Pt_100_4   | Cu_Pt_100_4    |              |              |
| Ag_Pd_111_3   | Ag_Pd_111_3    |              |              |
| Pt_Au_100_4   | Pt_Au_100_4    |              |              |

|              |              |
|--------------|--------------|
| Pd_Pt_100_4  | Pd_Pt_100_4  |
| Pd_Ag_100_1  | Pd_Ag_100_1  |
| Pt_Ag_111_3  | Pt_Ag_111_3  |
| Au_Pt_100_4  | Au_Pt_100_4  |
| Au_Pd_111_3  | Au_Pd_111_3  |
| Pd_Au_100_4  | Pd_Au_100_4  |
| Pt_Pd_111_3  | Pt_Pd_111_3  |
| Au_Pd_111_1L | Au_Pd_111_1L |
| Ir_Au_111_1  | Ir_Au_111_1  |
| Pt_Cu_100_1  | Pt_Cu_100_1  |
| Pt_Au_111_3  | Pt_Au_111_3  |
| Pd_Cu_100_4  | Pd_Cu_100_4  |
| Au_Pd_100_4  | Au_Pd_100_4  |
| Cu_Rh_111_1  | Cu_Rh_111_1  |
| Pt_Cu_111_2  | Pt_Cu_111_2  |
| Ag_Pd_100_1L | Ag_Pd_100_1L |
| Pd_Cu_111_3  | Pd_Cu_111_3  |
| Rh_Cu_100_1L | --           |
| Pd_Ag_111_3  | Pd_Ag_111_3  |
| Pd_Cu_100_1  | --           |
| Cu_Pt_100_2  | --           |
| Au_Rh_100_1  | Au_Rh_100_1  |
| Pt_Cu_100_2  | Pt_Cu_100_2  |
| Au_Pt_111_3  | Au_Pt_111_3  |
| Ir_Cu_100_1L | Ir_Cu_100_1L |
| Pt_Pd_100_1L | Pt_Pd_100_1L |
| Au_Pt_100_4  | Au_Pt_100_4  |
| Rh_Au_111_1  | Rh_Au_111_1  |
| Au_Pt_100_2  | Au_Pt_100_2  |
| Ir_Pt_111_3  | Ir_Pt_111_3  |
| Rh_Pt_100_1L | Rh_Pt_100_1L |
| Pt_Pd_100_2  | Pt_Pd_100_2  |
| Pt_Au_100_1  | Pt_Au_100_1  |
| Pd_Ag_111_2  | Pd_Ag_111_2  |
| Au_Pd_100_1L | Au_Pd_100_1L |
| Pt_Ag_100_2  | Pt_Ag_100_2  |
| Pd_Pt_111_1L | Pd_Pt_111_1L |
| Ag_Rh_111_1  | Ag_Rh_111_1  |
| Ag_Pd_111_1L | Ag_Pd_111_1L |
| Pt_Cu_111_1  | Pt_Cu_111_1  |
| Ir_Pt_111_1  | Ir_Pt_111_1  |
| Cu_Pd_100_1L | Cu_Pd_100_1L |
| --           | Cu_Ir_111_1  |
| --           | Pt_Ag_111_2  |

---

|    |              |  |
|----|--------------|--|
| -- | Rh_Au_111_2  |  |
| -- | Pt_Cu_111_3  |  |
| -- | Ag_Ir_111_1  |  |
| -- | Ir_Pd_100_1L |  |
| -- | Ir_Pt_100_1L |  |
| -- | Pd_Au_100_1  |  |
| -- | Rh_Pd_111_1L |  |
| -- | Pt_Cu_100_4  |  |
| -- | Pd_Pt_111_1  |  |
| -- | Pd_Pt_111_2  |  |
| -- | Pt_Au_111_2  |  |
| -- | Pd_Cu_100_1  |  |
| -- | Cu_Pt_100_1L |  |
| -- | Au_Rh_111_1  |  |
| -- | Pd_Pt_111_3  |  |
| -- | Au_Pt_100_1L |  |
| -- | Pt_Ag_111_1  |  |
| -- | Pt_Rh_111_1  |  |
| -- | Ir_Pd_111_1  |  |

---

## 6. Validation analysis

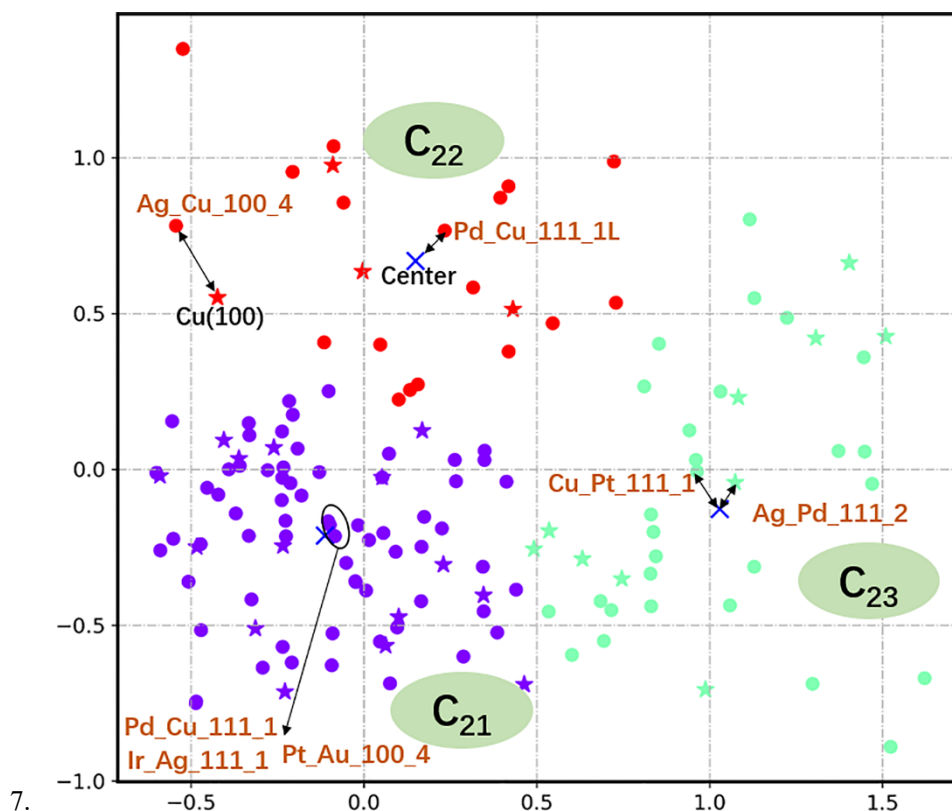

Fig. S6. The location of the ensembles as the validation samples of three clusters. Circle and pentagram points are for train and test data, respectively and X-type point are the centers of corresponding clusters.

Table S11. The distances ( $d_{center}$ ) between every system and the center of the  $C_{21}$  cluster in the feature space.

| <i>Systems</i> |              |                    | $d_{center}$     |
|----------------|--------------|--------------------|------------------|
| -0.1131035     | -0.211979029 | Center             | 0                |
| -0.0167341     | -0.179353695 | Pd_Ag_100_2        | 0.1017422        |
| -0.1916611     | 0.066426622  | Pt_Au_100_2        | 0.2892767        |
| -0.5072928     | -0.360498902 | Pd_111             | 0.4212403        |
| -0.2376922     | -0.099057304 | Au_Ir_111_1        | 0.1681477        |
| 0.34637804     | -0.455521769 | Au_Pt_111_2        | 0.520035         |
| -0.1033132     | -0.166690064 | <b>Pd_Cu_111_1</b> | <b>0.0463351</b> |
| -0.1289592     | -0.008840698 | Ag_Pt_100_4        | 0.2037562        |
| -0.5511725     | -0.222856241 | Ir_Pt_111_2        | 0.438204         |
| -0.0930275     | -0.628768775 | Pt_Pd_111_1        | 0.417273         |
| -0.0986524     | -0.178175991 | <b>Ir_Ag_111_1</b> | <b>0.0367625</b> |
| -0.4851277     | -0.745184646 | Cu_Ir_111_1L       | 0.6501617        |
| -0.600187      | -0.011421712 | Ir_Cu_111_1        | 0.5267576        |
| 0.05638056     | -0.204453527 | Rh_Pd_100_1L       | 0.1696511        |
| -0.3250793     | -0.41739781  | Pd_100             | 0.2951789        |
| 0.05297651     | -0.02592314  | Au_Pt_100_2        | 0.249398         |
| -0.3329456     | -0.213314456 | Pt_Ag_100_4        | 0.2198461        |
| -0.359124      | 0.01116127   | Pt_Pd_100_4        | 0.3321411        |
| -0.226771      | -0.165115951 | Pd_Pt_100_1L       | 0.1229489        |
| 0.26295136     | 0.030234115  | Ag_Pd_100_4        | 0.447308         |
| 0.22554866     | -0.189583585 | Pd_Au_100_2        | 0.3393919        |
| -0.2350033     | -0.569594154 | Ag_Pt_111_3        | 0.3778203        |
| 0.09627909     | -0.507343185 | Pt_Pd_100_1        | 0.3620512        |
| 0.00625462     | -0.388903299 | Pt_Pd_111_1L       | 0.2134211        |
| 0.26640587     | -0.038311669 | Ag_Pt_100_2        | 0.417358         |
| 0.28776049     | -0.600790548 | Pt_Ag_100_1        | 0.55845          |
| -0.2785745     | -0.00280235  | Pd_Cu_111_2        | 0.2667124        |
| -0.4721816     | -0.240112989 | Pt_Rh_100_1        | 0.3601785        |
| 0.34391239     | -0.312540432 | Ag_Pt_111_2        | 0.4679489        |
| -0.2253318     | -0.214773742 | Pd_Ag_100_4        | 0.1122631        |
| -0.0907389     | -0.526371925 | Pd_Pt_100_1        | 0.3151874        |
| -0.2085094     | -0.619932409 | Pt_Pd_111_2        | 0.4189609        |
| 0.07255406     | 0.050219604  | Cu_Pt_100_1        | 0.3212738        |
| 0.04650203     | -0.552603292 | Pd_Ag_111_1        | 0.3761633        |
| 0.07549619     | -0.686915964 | Pt_111             | 0.5110136        |
| -0.2056384     | 0.174952026  | Pt_100             | 0.3978421        |
| -0.2123387     | -0.044220206 | Pd_Cu_100_2        | 0.1949119        |
| -0.4534166     | -0.059403891 | Pd_Pt_100_2        | 0.3729506        |
| -0.2359492     | -0.027267972 | Cu_Pt_100_4        | 0.2218315        |
| 0.01493719     | -0.226967159 | Ag_Pd_111_3        | 0.128915         |
| -0.0838911     | -0.214338217 | <b>Pt_Au_100_4</b> | <b>0.0293075</b> |

|            |              |              |           |
|------------|--------------|--------------|-----------|
| -0.4211357 | -0.081293006 | Pd_Pt_100_4  | 0.3346082 |
| 0.38565317 | -0.523486052 | Pd_Ag_100_1  | 0.5880433 |
| -0.470955  | -0.516070986 | Pt_Ag_111_3  | 0.4696058 |
| -0.331136  | 0.1093348    | Au_Pt_100_4  | 0.388305  |
| -0.0512143 | -0.300342848 | Au_Pd_111_3  | 0.1078816 |
| 0.09198448 | -0.264539564 | Pd_Au_100_4  | 0.2117161 |
| -0.292701  | -0.636357672 | Pt_Pd_111_3  | 0.4608172 |
| -0.3705051 | -0.141494698 | Au_Pd_111_1L | 0.2668775 |
| 0.16661799 | -0.248453655 | Ir_Au_111_1  | 0.2820896 |
| -0.0234308 | -0.361832332 | Pt_Cu_100_1  | 0.1746345 |
| 0.44016747 | -0.386062612 | Pt_Au_111_3  | 0.580012  |
| -0.3907132 | -4.87E-05    | Pd_Cu_100_4  | 0.3492587 |
| 0.41230923 | -0.039631287 | Au_Pd_100_4  | 0.5529578 |
| -0.3330483 | 0.148185325  | Cu_Rh_111_1  | 0.4220119 |
| -0.5888055 | -0.260085662 | Pt_Cu_111_2  | 0.4781283 |
| -0.1805339 | -0.084157653 | Ag_Pd_100_1L | 0.144517  |
| -0.236714  | 0.121495759  | Pd_Cu_111_3  | 0.3556473 |
| -0.1018485 | 0.250715342  | Rh_Cu_100_1L | 0.4628312 |
| -0.0247813 | -0.359128775 | Pd_Ag_111_3  | 0.1716213 |
| 0.16554805 | -0.423188437 | Pd_Cu_100_1  | 0.3496514 |
| -0.2162045 | 0.218793441  | Cu_Pt_100_2  | 0.4429388 |
| 0.34861925 | 0.029901557  | Au_Rh_100_1  | 0.5212429 |
| -0.554619  | 0.154326659  | Pt_Cu_100_2  | 0.5736861 |
| -0.4860763 | -0.750065724 | Au_Pt_111_3  | 0.6547106 |
| 0.34913008 | 0.059627928  | Ir_Cu_100_1L | 0.5361252 |
| 0.17425198 | -0.152559403 | Pt_Pd_100_1L | 0.2934346 |
| -0.2328198 | 0.006181269  | Au_Pt_100_4  | 0.2488491 |
| -0.260226  | 0.069544572  | Rh_Au_111_1  | 0.3176485 |
| 0.05297651 | -0.02592314  | Au_Pt_100_2  | 0.249398  |
| -0.5898357 | -0.020666519 | Ir_Pt_111_3  | 0.5136867 |
| 0.10081681 | -0.473995856 | Rh_Pt_100_1L | 0.3382525 |
| -0.4049053 | 0.093467622  | Pt_Pd_100_2  | 0.4224286 |
| 0.46362658 | -0.690399959 | Pt_Au_100_1  | 0.7493358 |
| 0.06292584 | -0.565620686 | Pd_Ag_111_2  | 0.3950301 |
| 0.2299573  | -0.305767948 | Au_Pd_100_1L | 0.3556502 |
| -0.3613919 | 0.034358948  | Pt_Ag_100_2  | 0.3497564 |
| -0.2282419 | -0.713641733 | Pd_Pt_111_1L | 0.5147061 |
| 0.16867346 | 0.124065877  | Ag_Rh_111_1  | 0.4385481 |
| -0.2340107 | -0.245666748 | Ag_Pd_111_1L | 0.1255125 |
| -0.3137514 | -0.510716723 | Pt_Cu_111_1  | 0.3598663 |
| -0.4834146 | -0.248911509 | Ir_Pt_111_1  | 0.3721482 |
| 0.34590526 | -0.403770957 | Cu_Pd_100_1L | 0.4974668 |

Table S12. The reaction barriers and reaction enthalpy ( $E_a$  and  $E_{enth}$ ) of key elementary

steps (ES) and desorption energy ( $E_{de}$ ) of products for  $\text{NH}_3$ -SCO on Cu(100), Pt\_Au\_100\_4 and Pd\_Cu\_111\_1 (Units of  $E_a$ ,  $E_{enth}$  and  $E_{de}$ : eV).

| <i>ES</i>                                                  | Pt_Au_100_4 |            |          | Pd_Cu_111_1 |            |          |
|------------------------------------------------------------|-------------|------------|----------|-------------|------------|----------|
|                                                            | $E_a$       | $E_{enth}$ | $E_{de}$ | $E_a$       | $E_{enth}$ | $E_{de}$ |
| $\text{NH}_3^* + \text{O}^* = \text{NH}_2^* + \text{OH}^*$ | 1.15        | 0.05       | --       | 1.17        | 0.51       | --       |
| $\text{N}^* + \text{N}^* = \text{N}_2 + 2^*$               | 1.39        | -1.83      | 0.41     | 1.89        | -1.14      | 0.33     |
| $\text{N}^* + \text{O}^* = \text{NO}^* + ^*$               | 1.80        | -0.72      | 0.42     | 2.06        | -0.13      | 2.18     |
| $\text{N}^* + \text{NO}^* = \text{N}_2\text{O}^* + ^*$     | 2.07        | 0.59       | 0.04     | 2.11        | 0.99       | 0.14     |

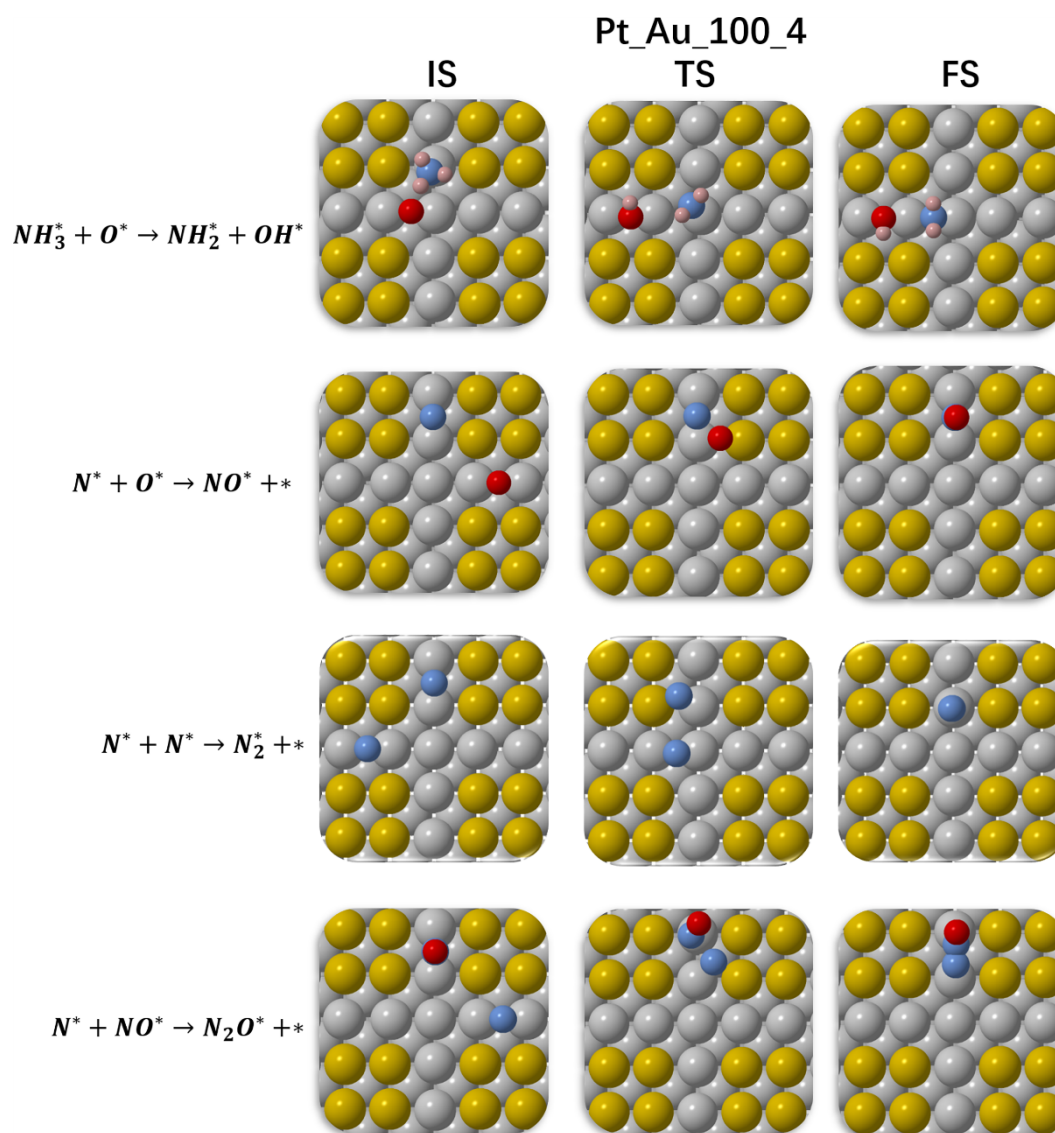

Fig. S7. The configurations of initial, transition and final states (IS, TS and FS) of primary elementary steps of simplified  $\text{NH}_3$ -SCO process on Pt\_Au\_100\_4 system.



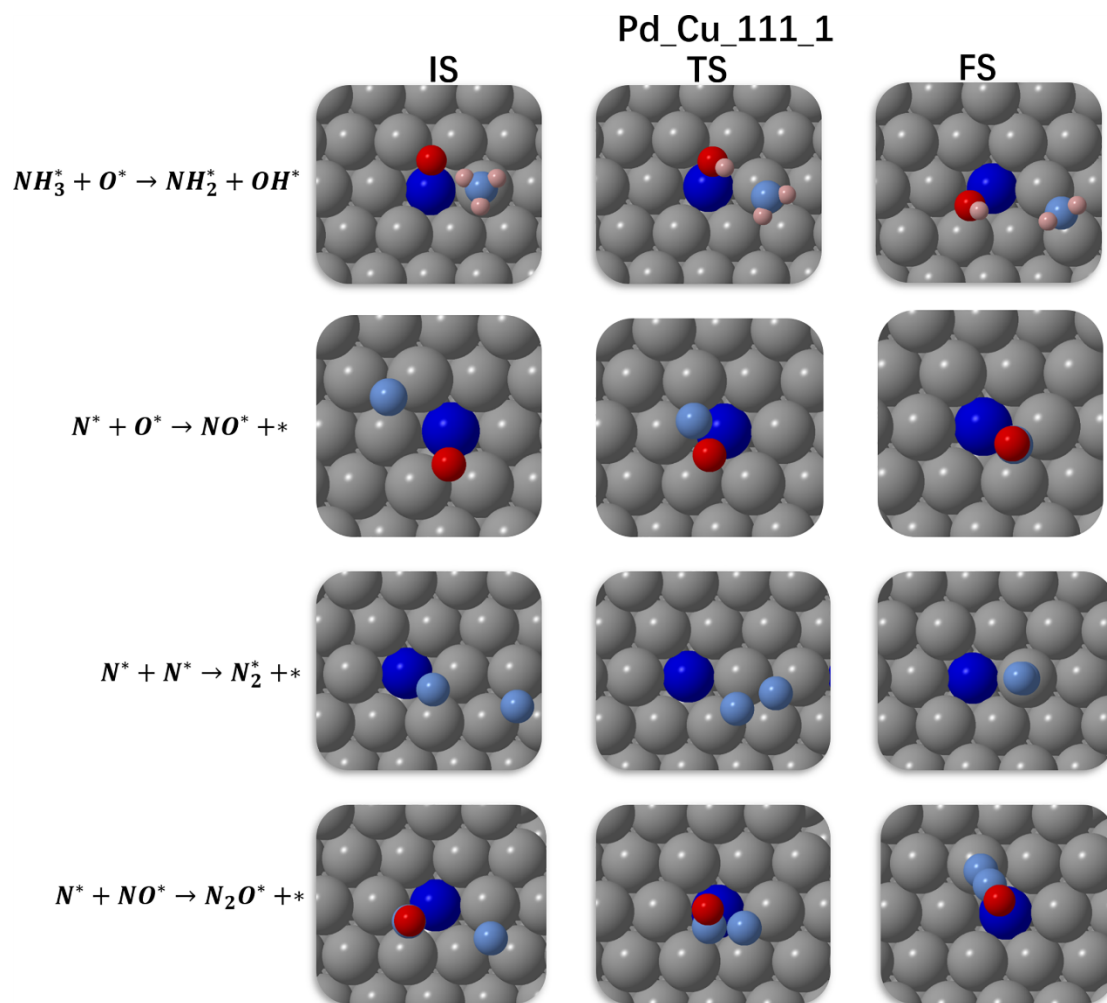

Fig. S8. The configurations of initial, transition and final states (IS, TS and FS) of primary elementary steps of simplified  $NH_3$ -SCO process on Pd\_Cu\_111\_1 system.

Table S13. The distances ( $d_{center}$ ,  $d_{Cu(100)}$ ) between every system and the center of the  $C_{22}$  cluster or Cu(100) in the feature space.

| Systems      |          |                     | $d_{center}$    | $d_{Cu(100)}$   |
|--------------|----------|---------------------|-----------------|-----------------|
| 0.149029235  | 0.668409 | Center              | 0               | 0.584277        |
| 0.723212697  | 0.98735  | Au_Cu_111_3         | 0.656818        | 1.226723        |
| 0.546148702  | 0.468645 | Cu_Ag_100_4         | 0.444533        | 0.973049        |
| 0.31579723   | 0.583225 | Cu_Ag_100_2         | 0.187264        | 0.739873        |
| -0.058948732 | 0.855538 | Rh_Cu_111_1L        | 0.279772        | 0.474753        |
| -0.523506637 | 1.348645 | Au_Cu_111_1L        | 0.95657         | 0.80363         |
| 0.418729288  | 0.377759 | Cu_Ag_100_1         | 0.396504        | 0.859806        |
| 0.39468872   | 0.871304 | Ag_Cu_111_3         | 0.318614        | 0.878444        |
| -0.087656813 | 1.036574 | Pt_Cu_111_1L        | 0.437682        | 0.590109        |
| -0.206182506 | 0.954401 | Cu_Ag_111_1L        | 0.456034        | 0.457916        |
| -0.115019891 | 0.407205 | Cu_Pd_100_2         | 0.371415        | 0.340361        |
| 0.41818994   | 0.908041 | Ag_Cu_100_2         | 0.360376        | 0.914074        |
| 0.100793623  | 0.223938 | Cu_Pd_100_1         | 0.447081        | 0.617992        |
| 0.729039974  | 0.534381 | Cu_Au_100_2         | 0.595295        | 1.15255         |
| 0.13333044   | 0.25469  | Cu_Pd_100_4         | 0.414017        | 0.63079         |
| 0.156116924  | 0.272205 | Ag_Rh_100_1         | 0.396267        | 0.643198        |
| 0.047356276  | 0.400224 | Pd_Cu_100_1L        | 0.286811        | 0.494383        |
| -0.543410033 | 0.781383 | <b>Ag_Cu_100_4</b>  | 0.701595        | <b>0.259529</b> |
| 0.233847033  | 0.765854 | <b>Pd_Cu_111_1L</b> | <b>0.129188</b> | 0.691375        |
| -0.089892032 | 0.975566 | Ir_Cu_111_1L        | 0.389138        | 0.539667        |
| -0.423385923 | 0.551276 | Cu_100              | 0.584277        | 0               |
| -0.003407145 | 0.634811 | Au_Cu_100_1L        | 0.156095        | 0.428206        |
| 0.430904777  | 0.513669 | Pt_Cu_100_1L        | 0.321556        | 0.855118        |

Table S14. The reaction barriers and reaction enthalpy ( $E_a$  and  $E_{enth}$ ) of key elementary steps (ES) and desorption energy ( $E_{de}$ ) of products for  $NH_3$ -SCO on Cu(100), Pd\_Cu\_111\_1L and Ag\_Cu\_100\_4 (Units of  $E_a$ ,  $E_{enth}$  and  $E_{de}$ : eV).

| ES                       | Cu(100) |            |          | Pd_Cu_111_1L |            |          | Ag_Cu_100_4 |            |          |
|--------------------------|---------|------------|----------|--------------|------------|----------|-------------|------------|----------|
|                          | $E_a$   | $E_{enth}$ | $E_{de}$ | $E_a$        | $E_{enth}$ | $E_{de}$ | $E_a$       | $E_{enth}$ | $E_{de}$ |
| $NH_3^*+O^*=NH_2^*+OH^*$ | 0.92    | -0.03      | --       | 0.85         | -0.14      | --       | 0.29        | -0.58      | --       |
| $N^*+N^*=N_2+2^*$        | 2.39    | -1.08      | --       | 1.46         | -2.49      | 0.22     | 1.49        | -2.22      | 0.19     |
| $N^*+O^*=NO^*+^*$        | 2.69    | 1.30       | 1.21     | 2.07         | 0.31       | 1.339    | 2.00        | 0.81       | 1.31     |
| $N^*+NO^*=N_2O^*+^*$     | 1.15    | 0.00       | --       | 0.95         | -0.68      | 0.138    | 0.68        | -1.05      | 0.704    |

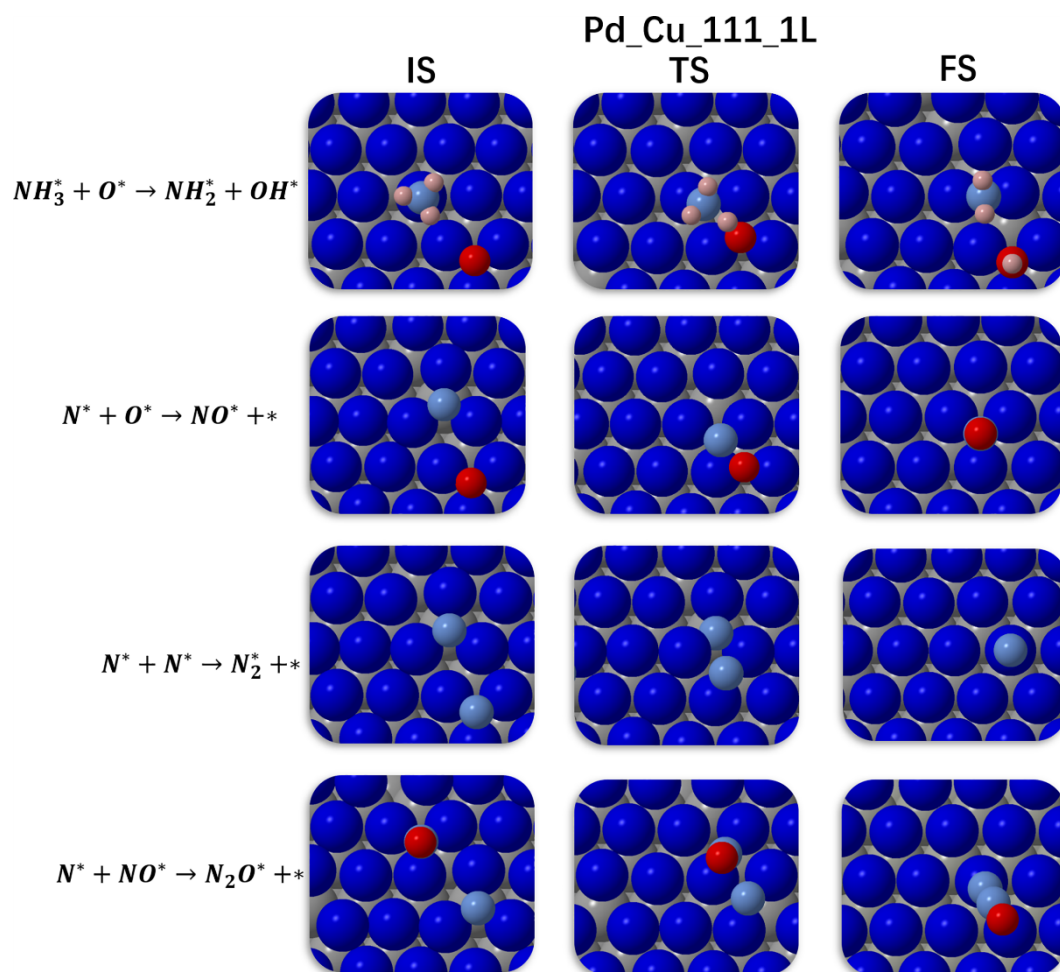

Fig. S9. The configurations of initial, transition and final states (IS, TS and FS) of primary elementary steps of simplified  $NH_3$ -SCO process on Pd\_Cu\_111\_1L system.

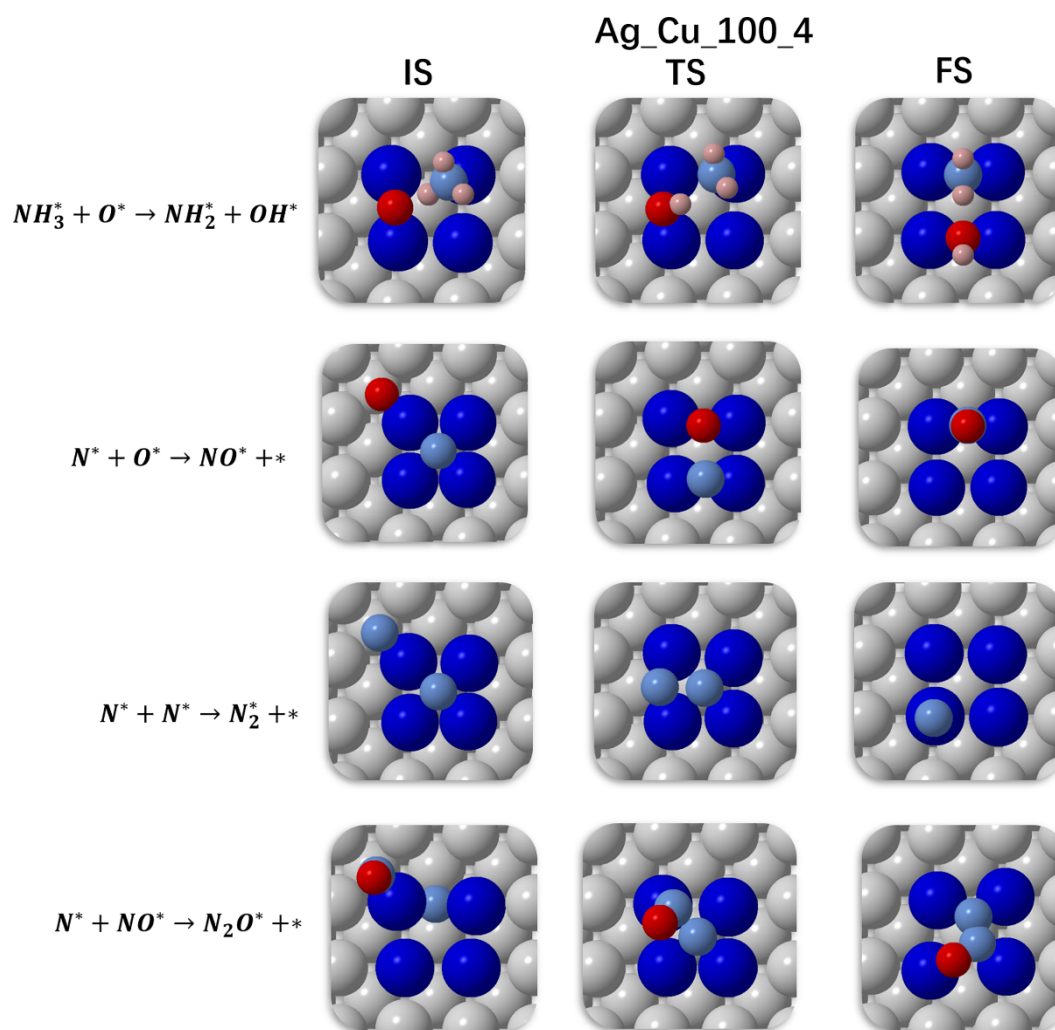

Fig. S10. The configurations of initial, transition and final states (IS, TS and FS) of primary elementary steps of simplified  $NH_3$ -SCO process on Ag\_Cu\_100\_4 system.

Table S15. The distances ( $d_{center}$ ) between every system and the center of the  $C_{23}$  cluster in the feature space.

| <i>Systems</i> |              |                    | $d_{center}$     |
|----------------|--------------|--------------------|------------------|
| 1.02849922     | -0.126545316 | Center             | 0                |
| 0.94154816     | 0.124899339  | Cu_Pd_111_2        | 0.2660543        |
| 0.83030616     | -0.144882048 | Pd_Au_111_3        | 0.1990395        |
| 1.62174265     | -0.670195267 | Ir_Pt_111_1L       | 0.8046695        |
| 1.52370707     | -0.890336474 | Cu_Pt_111_1L       | 0.9102789        |
| 1.12925843     | 0.549110863  | Cu_111             | 0.6831279        |
| 1.44837815     | 0.05688678   | Ag_Pt_100_1        | 0.4581983        |
| 0.96007319     | 0.03014914   | Cu_Pd_111_3        | 0.1709833        |
| 1.05880081     | -0.436592212 | Cu_Pt_111_3        | 0.3115241        |
| 1.22369423     | 0.485949936  | Cu_Ag_111_1        | 0.6428464        |
| 1.44565148     | 0.359323905  | Cu_Ag_111_3        | 0.6403787        |
| 0.68434986     | -0.422857487 | Pt_Au_111_2        | 0.4541362        |
| 1.29760496     | -0.688321774 | Rh_Pt_111_1L       | 0.622905         |
| 0.5344846      | -0.456336859 | Cu_Pt_100_1L       | 0.5939806        |
| 0.69394883     | -0.550721583 | Ir_Pt_100_1L       | 0.5402309        |
| 1.03123329     | 0.249542159  | Ag_Pd_100_2        | 0.3760974        |
| 0.84456955     | -0.27898223  | Ir_Pd_111_1L       | 0.2388873        |
| 0.82886363     | -0.335015411 | Pd_Au_111_2        | 0.2886419        |
| 0.71554252     | -0.451780227 | Pt_Ag_111_1        | 0.4513531        |
| 0.81059864     | 0.265892865  | Cu_Au_100_1        | 0.4488746        |
| 0.83075789     | -0.439400727 | Pd_Au_111_1        | 0.3701083        |
| 1.11585772     | 0.801838502  | Ag_Cu_111_2        | 0.9324849        |
| 1.37262665     | 0.058838173  | Au_Pd_100_2        | 0.3908845        |
| 0.85337227     | 0.402660325  | Cu_Au_100_4        | 0.5574299        |
| 0.83739107     | -0.200816316 | Cu_Pt_111_2        | 0.2050329        |
| 0.96340752     | -0.007584168 | <b>Cu_Pt_111_1</b> | <b>0.1356049</b> |
| 0.60160412     | -0.5954729   | Pd_Au_100_1        | 0.6341392        |
| 1.12871814     | -0.312630735 | Au_Pd_111_2        | 0.2113566        |
| 1.46988646     | -0.046434415 | Au_Pt_100_1        | 0.4485983        |
| 1.40387493     | 0.662450745  | Ag_Cu_100_1        | 0.8737401        |
| 1.30723669     | 0.4208852    | Cu_Ag_111_2        | 0.6143084        |
| 1.50949341     | 0.426317678  | Cu_Au_111_1        | 0.7328116        |
| 0.98787053     | -0.706739677 | Pt_Au_111_1        | 0.5816152        |
| 0.53560459     | -0.196892451 | Au_Rh_111_1        | 0.4978894        |
| 1.07390175     | -0.042015535 | <b>Ag_Pd_111_2</b> | <b>0.0959514</b> |
| 0.74593216     | -0.351505911 | Rh_Pd_111_1L       | 0.3611806        |
| 1.082883       | 0.230546993  | Cu_Pd_111_1        | 0.3612098        |
| 0.4915884      | -0.255544492 | Pt_Ag_111_2        | 0.5521902        |
| 0.6320079      | -0.287284207 | Ir_Pd_100_1L       | 0.4278345        |

Table S16. The reaction barriers and reaction enthalpy ( $E_a$  and  $E_{enth}$ ) of key elementary steps (ES) and desorption energy ( $E_{de}$ ) of products for NH<sub>3</sub>-SCO on Cu\_Pt\_111\_1 (Units of  $E_a$ ,  $E_{enth}$  and  $E_{de}$ : eV).

| <i>ES</i>                      | <b>Cu_Pt_111_1</b> |            |          |
|--------------------------------|--------------------|------------|----------|
|                                | $E_a$              | $E_{enth}$ | $E_{de}$ |
| $NH_3^* + O^* = NH_2^* + OH^*$ | 0.61               | 0.22       | --       |
| $N^* + N^* = N_2 + 2^*$        | 1.57               | -3.17      | 0.13     |
| $N^* + O^* = NO^* + ^*$        | 1.47               | -0.32      | 1.28     |
| $N^* + NO^* = N_2O^* + ^*$     | 0.5                | -0.65      | -0.62    |

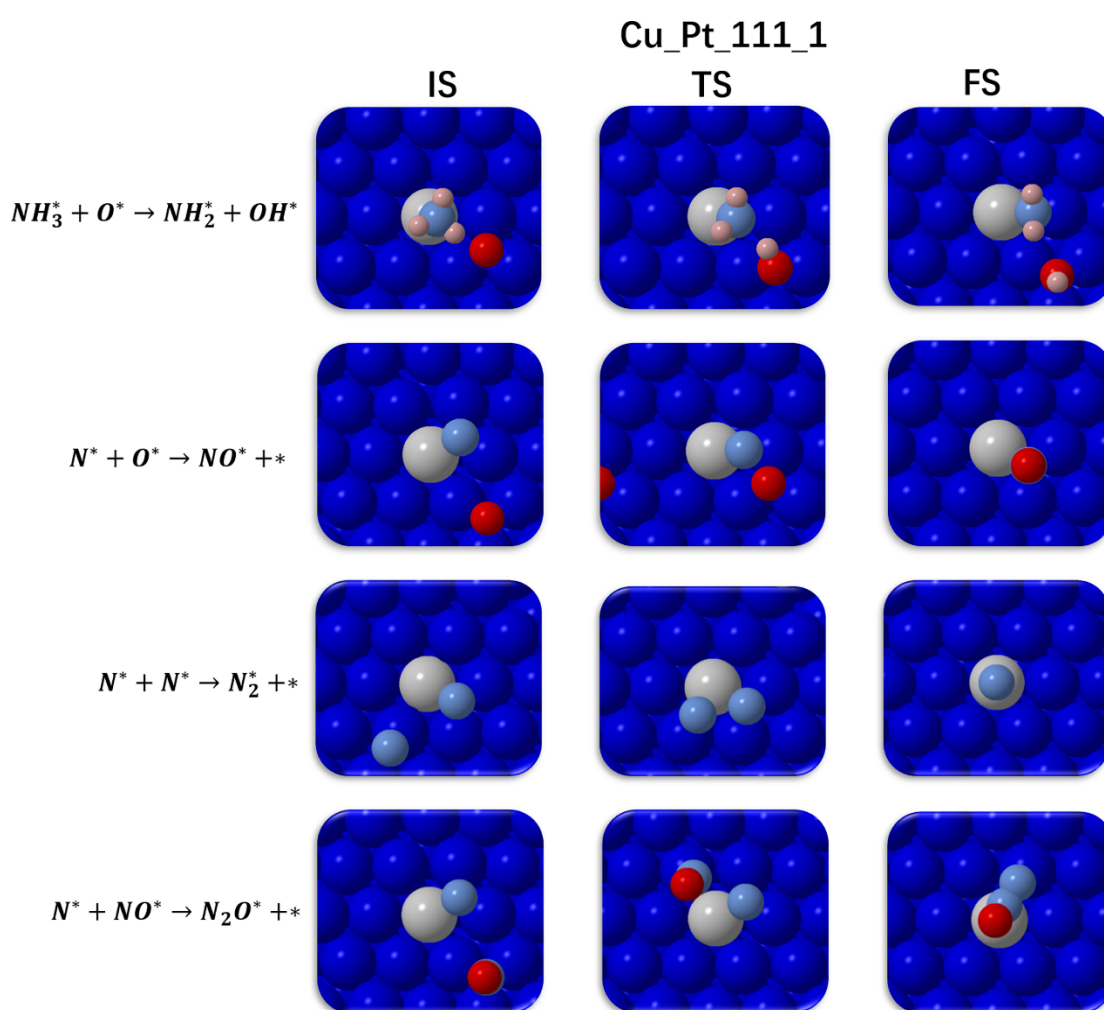

Fig. S11. The configurations of initial, transition and final states (IS, TS and FS) of primary elementary steps of simplified NH<sub>3</sub>-SCO process on Cu\_Pt\_111\_1 system.

## References:

1. H. Ma, W. F. Schneider, *ACS Catal.*, 2019, **9**, 2407–2414.
2. Z. Jiang, P. Qin, T. Fang, *Chem. Phys.*, 2014, **445**, 59–67.
3. J. Pérez-Ramírez, E. V. Kondratenko, G. Novell-Leruth, J. M. Ricart, *J. Catal.*, 2009, **261**, 217–223.
4. N. López, M. García-Mota, J. Gómez-Díaz, *J. Phys. Chem. C*, 2008, **1**, 112.
5. D. Yuan, X. Gong, and R. Wu, *Phys. Rev. B*, 2007, **75**, 085428.
6. H. Zhuang, A. J. Tkalych, E. A. Carter, *J. Phys. Chem. C*, 2016, **120**, 23698.23706.
7. R. Tran, Z. Xu, B. Radhakrishnan, D. Winston, W. Sun, K. A. Persson, S. P. Ong, *Sci. Data*, 2016, **3**, 160080.

## Appendix:

Considering a lot of adsorption configurations may change for each system after optimization and would cause many same or similar binding configurations for every species, we have developed a python-based procedure to fast check slab models and extract the information of surface and adsorbates. The procedure mainly consists of the two base functions: *distinguish\_atom\_binding* and *get\_binding\_adatom*. The *distinguish\_atom\_binding* could effectively distinguish the types of atoms: adsorbates, surface atoms and subsurface atoms and output the corresponding atomic symbols and the serial number of every atom in the configurations. Based that, the *get\_binding\_adatom* mainly extract the information of binding sites and atoms: the atom of the adsorbate binding to surface atoms, binding type of the adsorbate and surface atoms binding to the adsorbate. Taking a binding configuration of  $\text{NH}_2$  on Pd\_Cu\_111\_1 ensemble (in Fig. A1) as the typical example, related attribution and information could be obtained, as shown in Table A1.

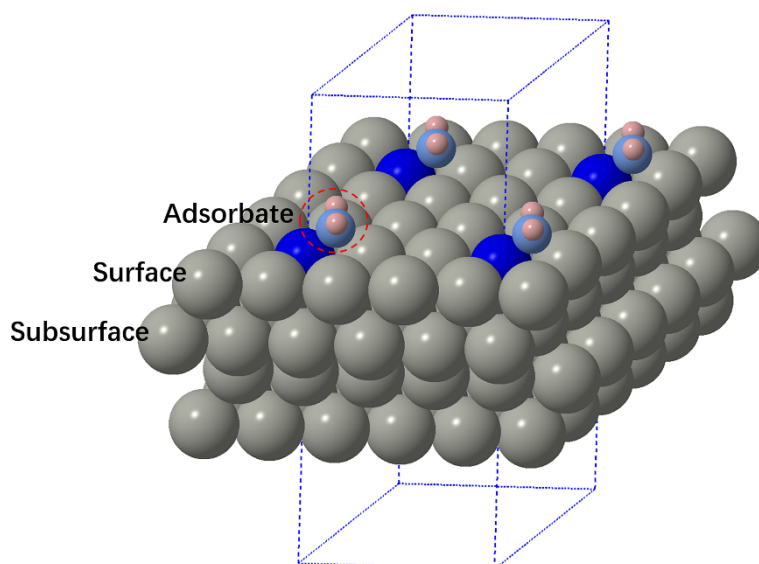

Fig. A1. The typical configuration of  $\text{NH}_2$  on Pd\_Cu\_111\_1 ensemble.

Table A1. Related information extracted from the configuration of  $\text{NH}_2$  on Pd\_Cu\_111\_1 ensemble.

| Attribution                                        | Information                        |
|----------------------------------------------------|------------------------------------|
| Surface atoms                                      | Pd, Pd, Pd, Pd, Pd, Pd, Pd, Pd, Cu |
| Subsurface atoms                                   | Pd, Pd, Pd, Pd, Pd, Pd, Pd, Pd, Pd |
| Adsorbate                                          | $\text{NH}_2$                      |
| The atom of the adsorbate binding to surface atoms | N                                  |
| Binding type of the adsorbate                      | bridge                             |
| Surface atoms binding to the adsorbate             | Pd, Cu                             |



## Base function 1:

```
1. from catkit.gen.utils import get_unique_coordinates
2. import numpy as np
3. def distinguish_atom_binding(poscar,tol_layer=0.01,tol=0.05,base_
   layer=4,atoms_layer=9):
4.     '''
5.     To distinguish the atoms at different layer
6.     Parameters:
7.     -----
8.     poscar:
9.         atoms objects
10.    tol:
11.        tolerance whether atoms in the same layer
12.    layer:
13.        layer number; eg. surface atoms:'surf_atom',subsurface ato
   m:'subsurf_atom',
14.        adsorb layer:'adatom,others could be represented by the co
   rresponding number
15.    base_layer:
16.        the layer of the substrate
17.    -----
18.    '''
19.    if isinstance(poscar, str):
20.        struct=read(poscar,format='vasp')
21.    else:
22.        struct=poscar
23.    #the representative Z coords of every layer
24.    coordinates_layer=get_unique_coordinates(struct,axis=2, tag=T
   rue, tol=tol_layer)
25.    coordinates=struct.get_scaled_positions()[:,2]
26.    #the dict about the atoms and corresponding layers
27.    key_atom=[]
28.    value_layer=[]
29.    #print(coordinates_layer)
30.    for i,coord in enumerate(coordinates):
31.        for j,coord_layer in enumerate(coordinates_layer):
32.            dis=np.abs(coord-coord_layer)
33.            if dis < tol:
34.                #print(f'atom {i+1} belongs to layer {j+1}')
35.                key_atom += [i]
36.                value_layer += [j+1]
37.                break
38.            elif j >= base_layer:
```

```

39.         #print(f'atom {i+1} belongs to layer {j+1}')
40.         key_atom += [i]
41.         value_layer += [j+1]
42.
43.     #if len(key_atom) != (i+1):
44.     #    raise ValueError('tol is too large and not to distinguish
the layers; Please reduce tol!')
45.     dict_atom_layer=dict(zip(key_atom,value_layer))
46.     #print(dict_atom_layer)
47.     adatoms,adatoms_symb=[],[]
48.     surfatoms,surfatoms_symb=[],[]
49.     subsurfatoms,subsurfatoms_symb=[],[]
50.     for k in range(len(coordinates)):
51.         #print(dict_atom_layer.get(k))
52.         if int(dict_atom_layer.get(k)) > base_layer:
53.             dict_atom_layer[k] = 'adatom'
54.             adatoms += [k]
55.             adatoms_symb += [struct.get_chemical_symbols()[k]]
56.         elif dict_atom_layer.get(k) == base_layer:
57.             dict_atom_layer[k] = 'surf_atom'
58.             surfatoms += [k]
59.             surfatoms_symb += [struct.get_chemical_symbols()[k]]
60.         elif dict_atom_layer.get(k) == (base_layer-1):
61.             dict_atom_layer[k] = 'subsurf_atom'
62.             subsurfatoms += [k]
63.             subsurfatoms_symb += [struct.get_chemical_symbols()[k]]
64.         else:
65.             continue
66.     #print(dict_atom_layer)
67.     base_element=['Au','Ag','Pd','Pt','Rh','Ru','Ir','Cu','Fe','C
o','Ni','Zn','Ti','Y','Zr','Nb','Mo','Tc','Hf','Ta','W','Re','Sc','
V','Cr','Mn']
68.     if len(surfatoms) > int(atoms_layer):
69.         #print('surface atoms >9')
70.         #print(surfatoms_symb)
71.         surfatoms_final,surfatoms_symb_final=[],[]
72.         tmp=[]
73.         for n,atom_symb in enumerate(surfatoms_symb):
74.             if atom_symb not in base_element:
75.                 #print(atom_symb)
76.                 adatoms += [surfatoms[n]]
77.                 adatoms_symb += [atom_symb]
78.                 #surfatoms.pop(n)
79.                 #surfatoms_symb.pop(n)

```

```

80.         tmp+=[n]
81.     for m,atom_symb in enumerate(surfatoms_symb):
82.         if m not in tmp:
83.             surfatoms_final += [surfatoms[m]]
84.             surfatoms_symb_final += [surfatoms_symb[m]]
85.         surfatoms=surfatoms_final
86.         surfatoms_symb=surfatoms_symb_final
87.         #print(surfatoms_symb)
88.         ### Ignore structures where Z coord of adatoms < Z coord o
f surfatoms
89.         Z_mean=np.mean([struct.get_scaled_positions()[i][2] for i
in surfatoms])
90.         Z_adatom=np.mean([struct.get_scaled_positions()[i][2] for
i in adatoms])
91.         if Z_adatom <= Z_mean:
92.             surfatoms=[]
93.             surfatoms_symb=[]
94.         ### Ignore the structures without standard and integrated sur
face configurations
95.         elif len(surfatoms) < int(atoms_layer):
96.             #raise ValueError(f'{poscar} can not been analyzed!')
97.             surfatoms=[]
98.             surfatoms_symb=[]
99.     return adatoms,adatoms_symb,surfatoms,surfatoms_symb,subsurfa
toms,subsurfatoms_symb

```

## Base function 2:

```

1. def get_binding_adatom(poscar):
2.     # extract surface atoms and adsorbed atoms
3.     #adatoms,adatoms_symb=distinguish_atom_binding(poscar,tol=0.0
5,layer='adatom')
4.     #surf_atoms,surf_atom_symb=distinguish_atom_binding(poscar,to
l=0.05,layer='surf_atom')
5.
6.     # neighbor list of atoms in struct
7.     if isinstance(poscar, str):
8.         struct=read(poscar,format='vasp')
9.     else:
10.        struct=poscar
11.    adatoms,adatoms_symb,surfatoms,surfatoms_symb,subsurfatoms,su
bsurfatoms_symb=distinguish_atom_binding(poscar,tol=0.05)
12.    #print(adatoms_symb,surfatoms_symb)
13.    #print(struct.symbols)
14.    cutOff = natural_cutoffs(struct,mult=1.0)

```

```

15.     #print(cutOff)
16.     nl = NeighborList(cutOff, self_interaction=False, bothways=True)
17.     nl.update(struct)
18.     ##### extract the adatoms binded with surface and corresponding surface atoms
19.     bind_adatoms=[]
20.     bind_adatoms_symb=[]
21.     bind_surfatoms=[]
22.     bind_surfatoms_symb=[]
23.     site_type=[]
24.     site_type2=[]
25.     site_type_symb=[]
26.     ### Extract the binded surface atoms and binded adsorbed atoms
27.     for i,atom in enumerate(adatoms):
28.         indices, offsets = nl.get_neighbors(atom)
29.         tmp=[]
30.         tmp2=[]
31.         #print(indices)
32.         for index in indices:
33.             #print(index)
34.             if index in surfatoms:
35.                 bind_adatoms += [atom]
36.                 tmp += [index]
37.                 tmp2 += [struct.get_chemical_symbols()[index]]
38.             else:
39.                 continue
40.         #tmp3_symb=[struct.get_chemical_symbols()[i] for i in tmp
41.         if tmp != []:
42.             bind_surfatoms += [tmp]
43.             bind_surfatoms_symb += [tmp2]
44.             site_type += [len(tmp2)]
45.             #print(struct.get_scaled_positions()[atom][0:-1])
46.             bind_adatoms=list(set(bind_adatoms))
47.             bind_adatoms_symb=[struct.get_chemical_symbols()[i] for i in
48.             bind_adatoms]
49.             ### Extract the bind type
50.             item=[]
51.             bind_type_symb = []
52.             for j,adatom in enumerate(bind_adatoms):
53.                 p1=struct.get_scaled_positions()[adatom][0:-1]
54.                 item_tmp=[]

```

```

54.         for k,atom in enumerate(subsurfatoms):
55.             p2=struct.get_scaled_positions()[atom][0:-1]
56.             if abs(p1[0]-p2[0])<0.025 and abs(p1[1]-p2[1])<0.025:
57.                 item_tmp +=[True]
58.             else:
59.                 item_tmp +=[False]
60.         if any(item_tmp):
61.             item +=[int(1)]
62.         else:
63.             item +=[int(0)]
64.     #print(item)
65.     typ={0:None,1:'top',2:'bri',3:'hol',4:'4-fold'}
66.     for m,bind in enumerate(site_type):
67.         bind_type=typ.get(bind)
68.         if bind_type == 'hol' and item[m]==0:
69.             bind_type_symb += ['fcc']
70.         elif bind_type == 'hol' and item[m]==1:
71.             bind_type_symb += ['hcp']
72.         else:
73.             bind_type_symb += [bind_type]
74.
75.     ### Extract the adsorbed species
76.     adspecie=[]
77.     for i,atom in enumerate(bind_adatoms):
78.         indices, offsets = nl.get_neighbors(atom)
79.         tmp3=[atom]
80.         #print(indices)
81.         for index in indices:
82.             if (index in surfatoms) or (index in subsurfatoms):
83.                 continue
84.             else:
85.                 tmp3+=[index]
86.         #print(tmp3)
87.         tmp3_symb=''.join(list([struct.get_chemical_symbols()[i]
88.             for i in tmp3]))
89.         Ele=list(dict(Counter(tmp3_symb)).keys())
90.         Num=list(dict(Counter(tmp3_symb)).values())
91.         #print(tmp3_symb)
92.         #print(Ele)
93.         mol='*'
94.         for j,E in enumerate(Ele):
95.             mol=mol+E
96.             if Num[j] == 1:
97.                 continue

```

```

97.         else:
98.             mol=mol+str(Num[j])
99.             if mol == '*OH2':
100.                mol='*H2O'
101.            else:
102.                adspecie +=[mol.split('*')[1]]
103.                #adspecie+=[ ''.join(list(chain.from_iterable(zip(El,Num)
104.                )))
104.                #mol=molecule(tmp3_symb)[0]
105.                #print(mol.symbol)
106.            return bind_adatoms,bind_adatoms_symb,adspecie,bind_type_symb,
bind_surfatoms,bind_surfatoms_symb

```
